# Supplementary material for: Calix[6]arene-based atropoisomeric pseudo[2]rotaxanes
Source: publisher site journal article supplement (doi:10.3762/bjoc.14.186), 2018-08-14
Supplement: Additional file 1 [file 1860-5397-14-186-S1.pdf]

## **Supporting Information**

**for**

# **Calix[6]arene-based atropoisomeric pseudo[2]rotaxanes**

Carmine Gaeta, Carmen Talotta\* and Placido Neri

Address: Dipartimento di Chimica e Biologia " A. Zambelli", Università di Salerno, Via  
Giovanni Paolo II 132, 84084 Fisciano (Salerno), Italy.

Email: Full name - email address of corresponding author

\*Corresponding author

**VT NMR studies of hexyloxy-calix[6]arene 1, 2D COSY and HSQC spectra  
of atropoisomeric pseudorotaxanes, details of DFT calculations and  
atomic coordinates**

## Variable Temperature $^1\text{H}$ NMR Spectra of **1** ( $\text{CDCl}_3$ , 600 MHz)

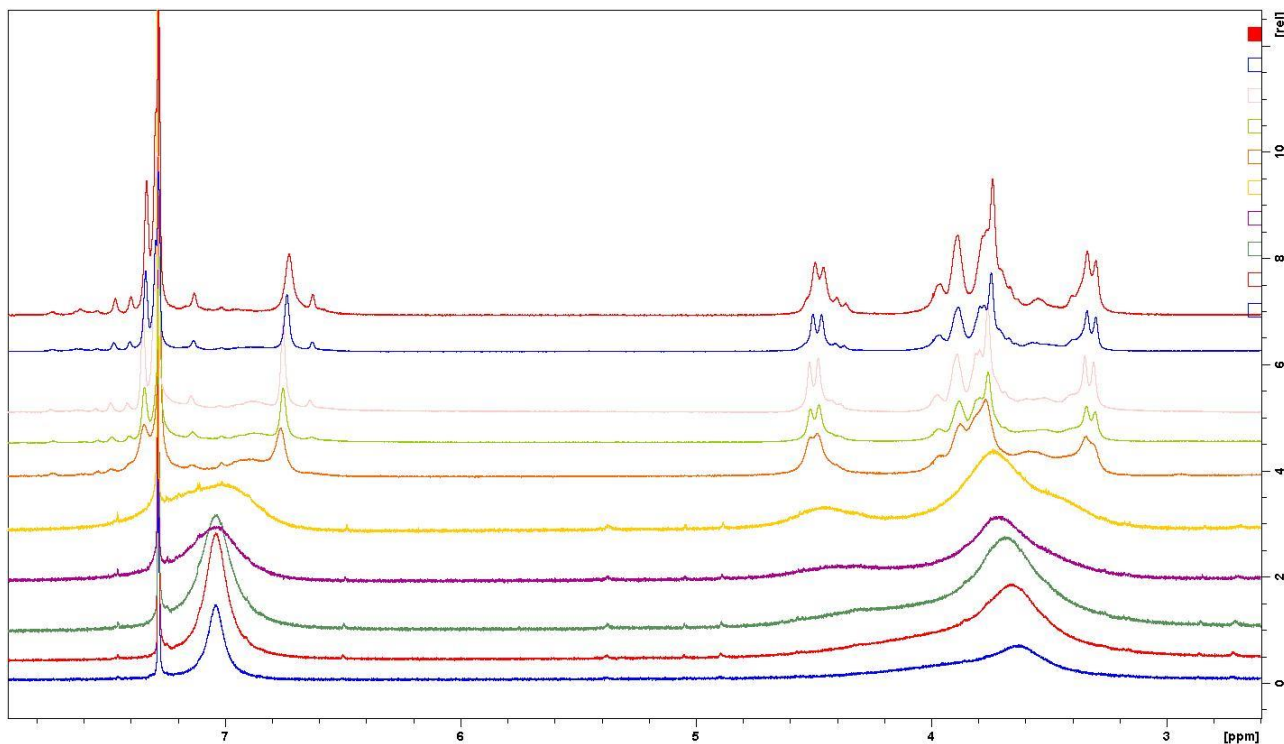

**Figure S1:**  $^1\text{H}$  NMR spectra of **1** (400 MHz,  $\text{CDCl}_3$ ) at (from bottom to top): **328** ( $T_c$ ); 323; 318; 313; 298; 273; 263; 253; 243; 233 K.

$$\Delta G_c^\ddagger = aT_c \left[ 9.972 + \log \left( \frac{T_c}{\sqrt{\Delta \nu^2 + 6J^2}} \right) \right]$$

Kurland, R. J.; Rubin, M. B.; Wise, M. B. *J. Chem. Phys.* **1964**, *40*, 2426

$T_c = 328$  K;  $\Delta \nu = 466$  Hz ;  $a = 4.575 \cdot 10^{-3}$  ( $\Delta G_c^\ddagger$  in Kcal/mol)

## 2D Spectra of 1 at 233 K (CDCl<sub>3</sub>, 600 MHz)

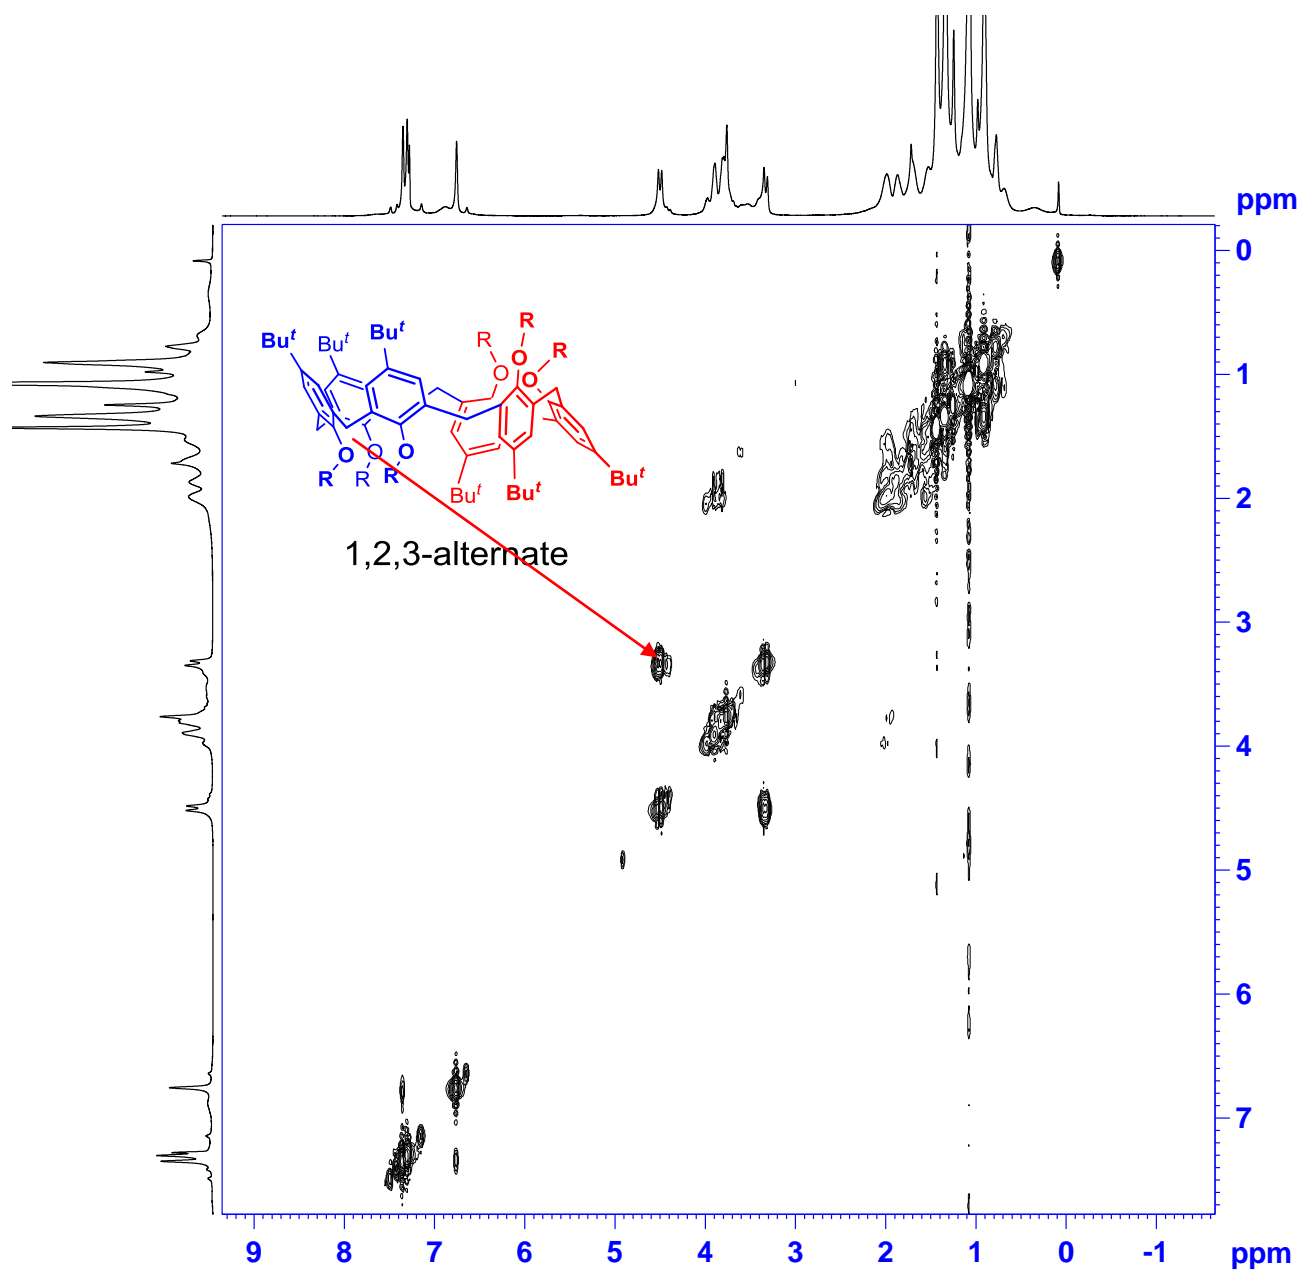

**Figure S2:** COSY spectrum of **1** (600 MHz, CDCl<sub>3</sub>) at 233 K.

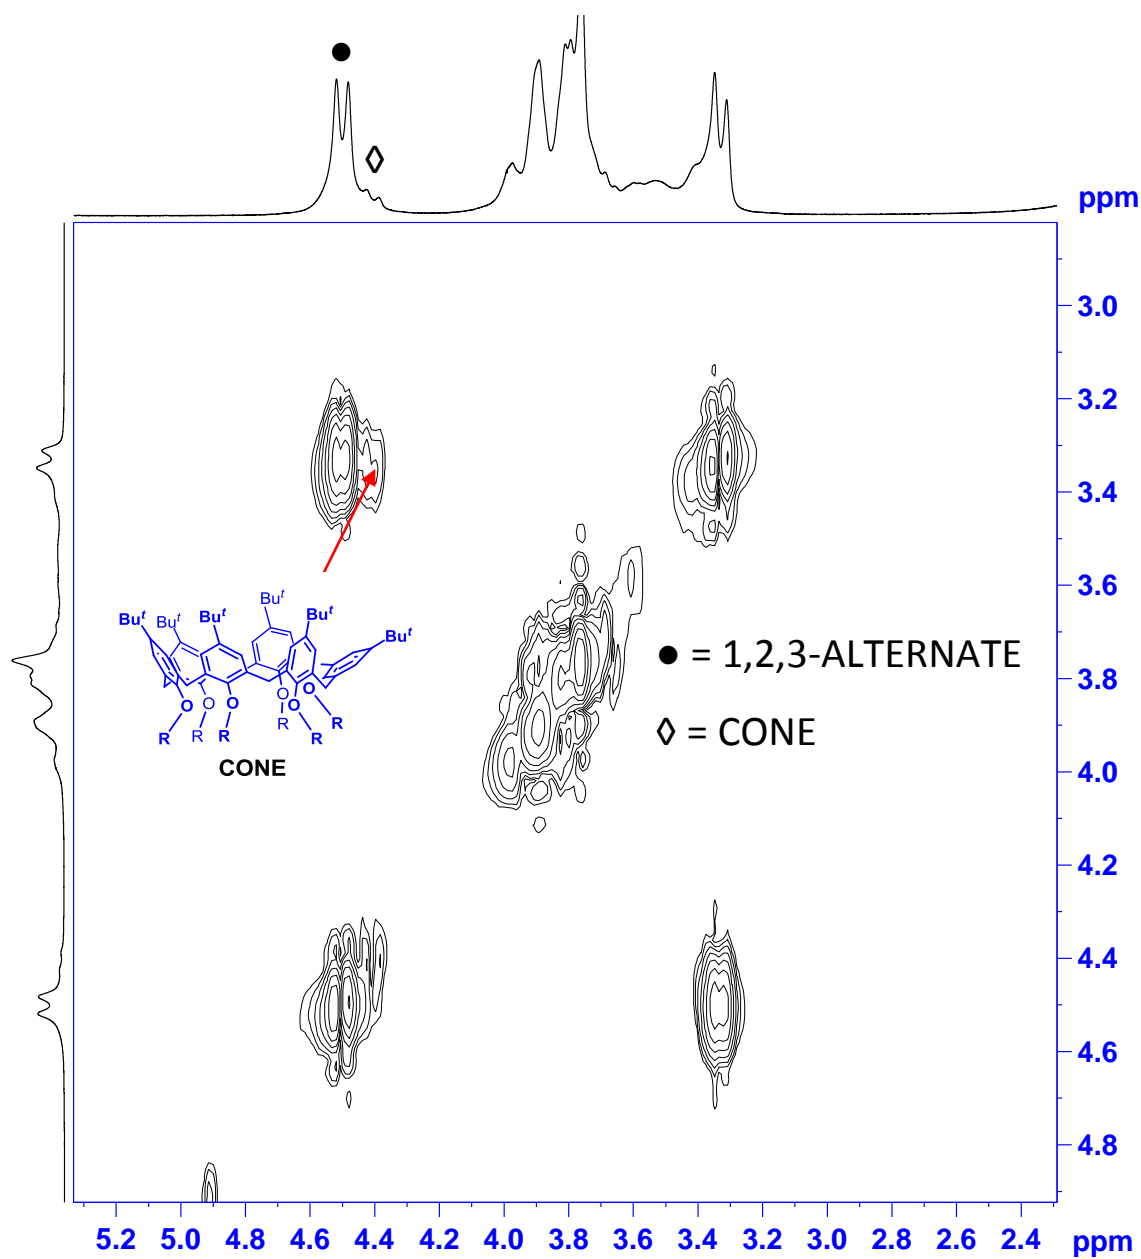

**Figure S3:** Expansion of the COSY spectrum of **1** (600 MHz, CDCl<sub>3</sub>) at 233 K.

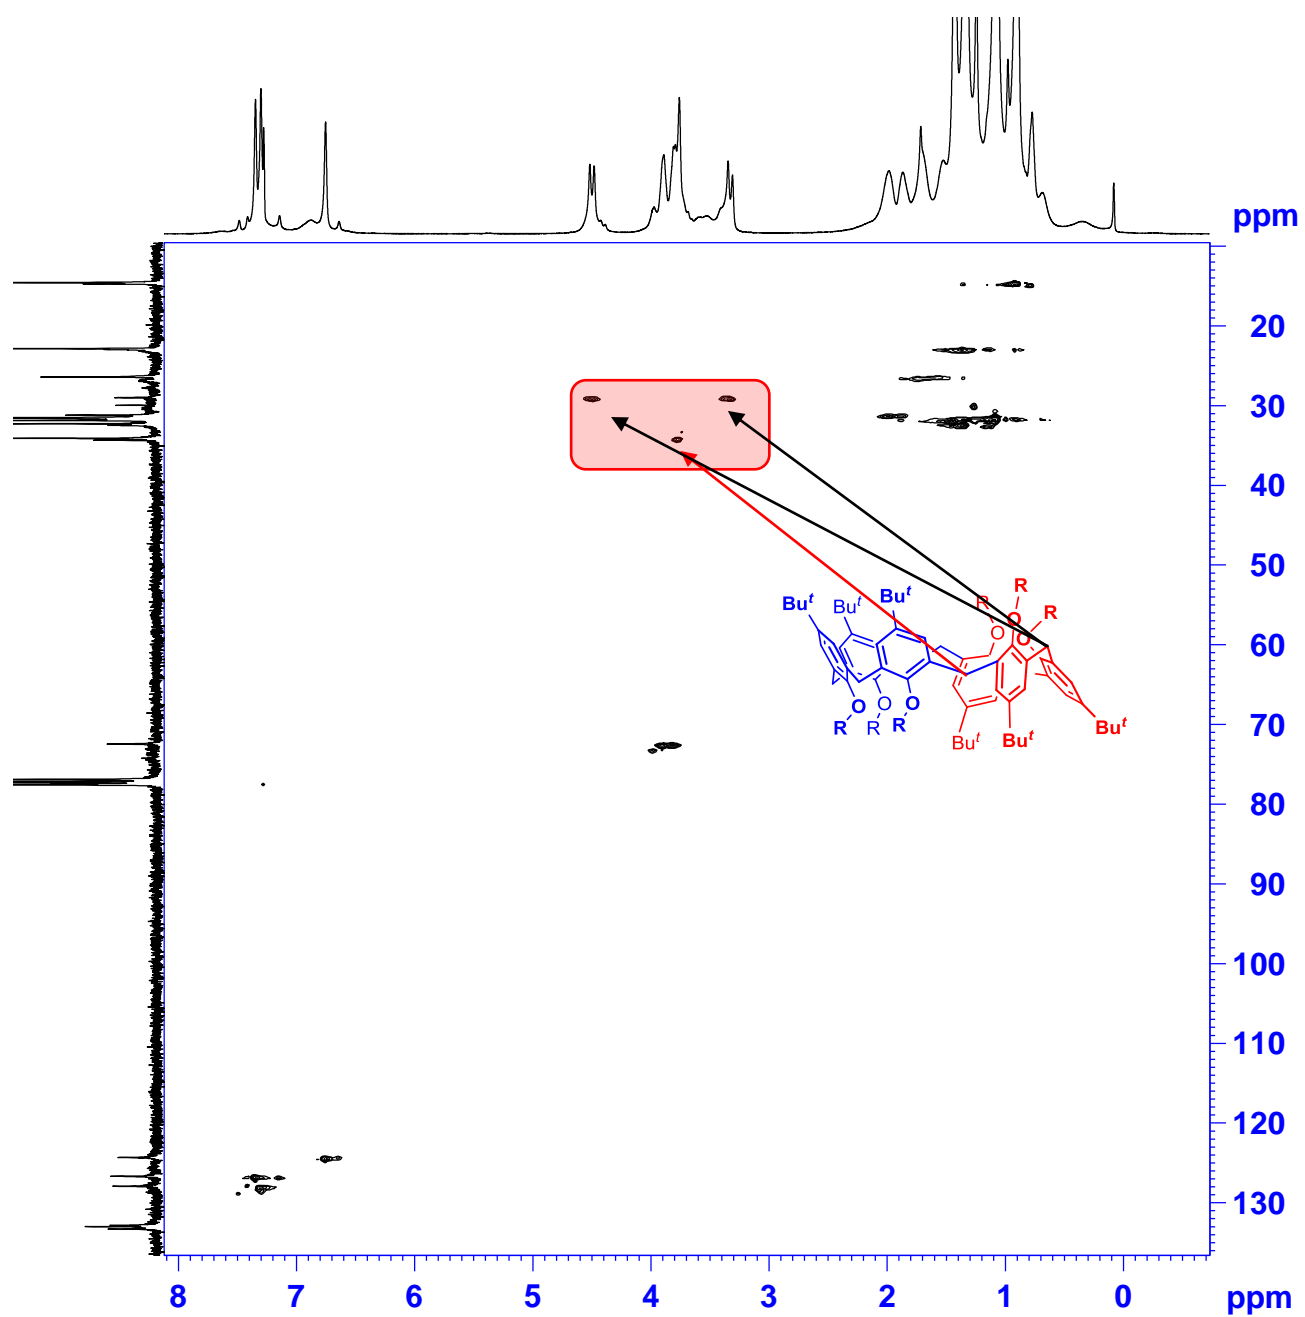

Figure S4: HSQC spectrum of 1 (600 MHz,  $\text{CDCl}_3$ ) at 233 K.

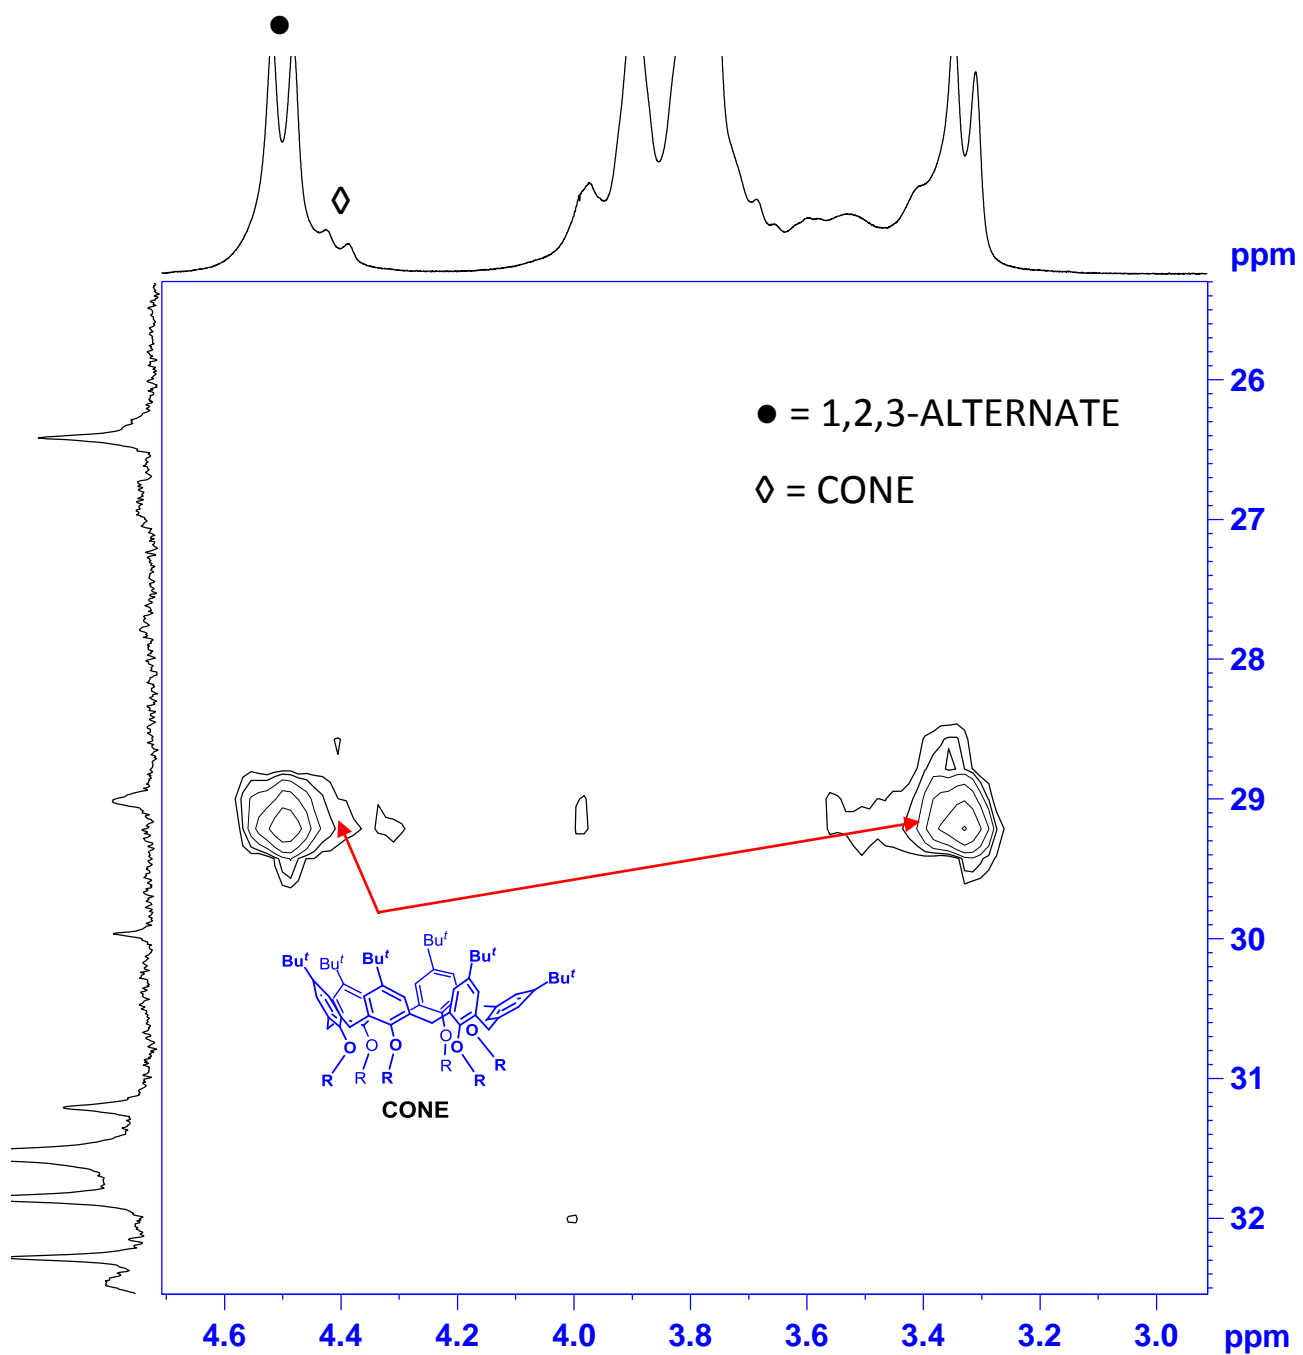

**Figure S5:** Expansion of the HSQC spectrum of **1** (600 MHz, CDCl<sub>3</sub>) at 233 K.

2D COSY spectrum of  $2^+ \subset 1^{cone}$  and  $2^+ \subset 1^{1,2,3-alt}$  atropoisomers at 298 K  
( $CDCl_3$ , 600 MHz)

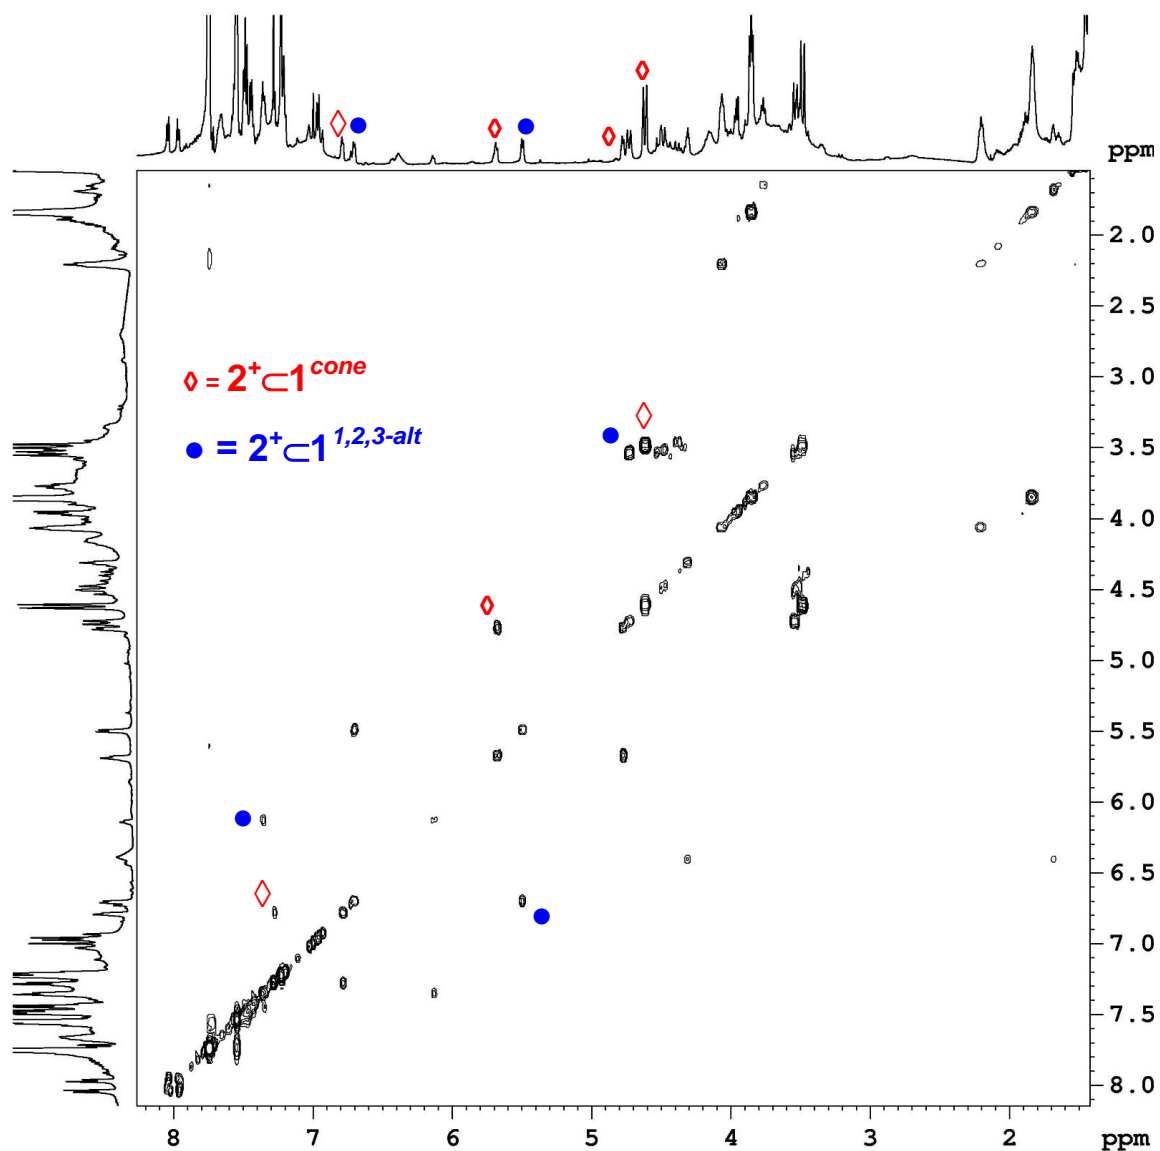

**Figure S6:** COSY spectrum (600 MHz,  $CDCl_3$ , 298 K) of a 1:1 mixture (0.003 M) of **1** and  $2^+ \cdot TFPB^-$  after 10 h by mixing.

2D COSY spectrum of  $2^+ \subset 1^{cone}$  atropoisomer at 298 K ( $CDCl_3$ , 600 MHz)

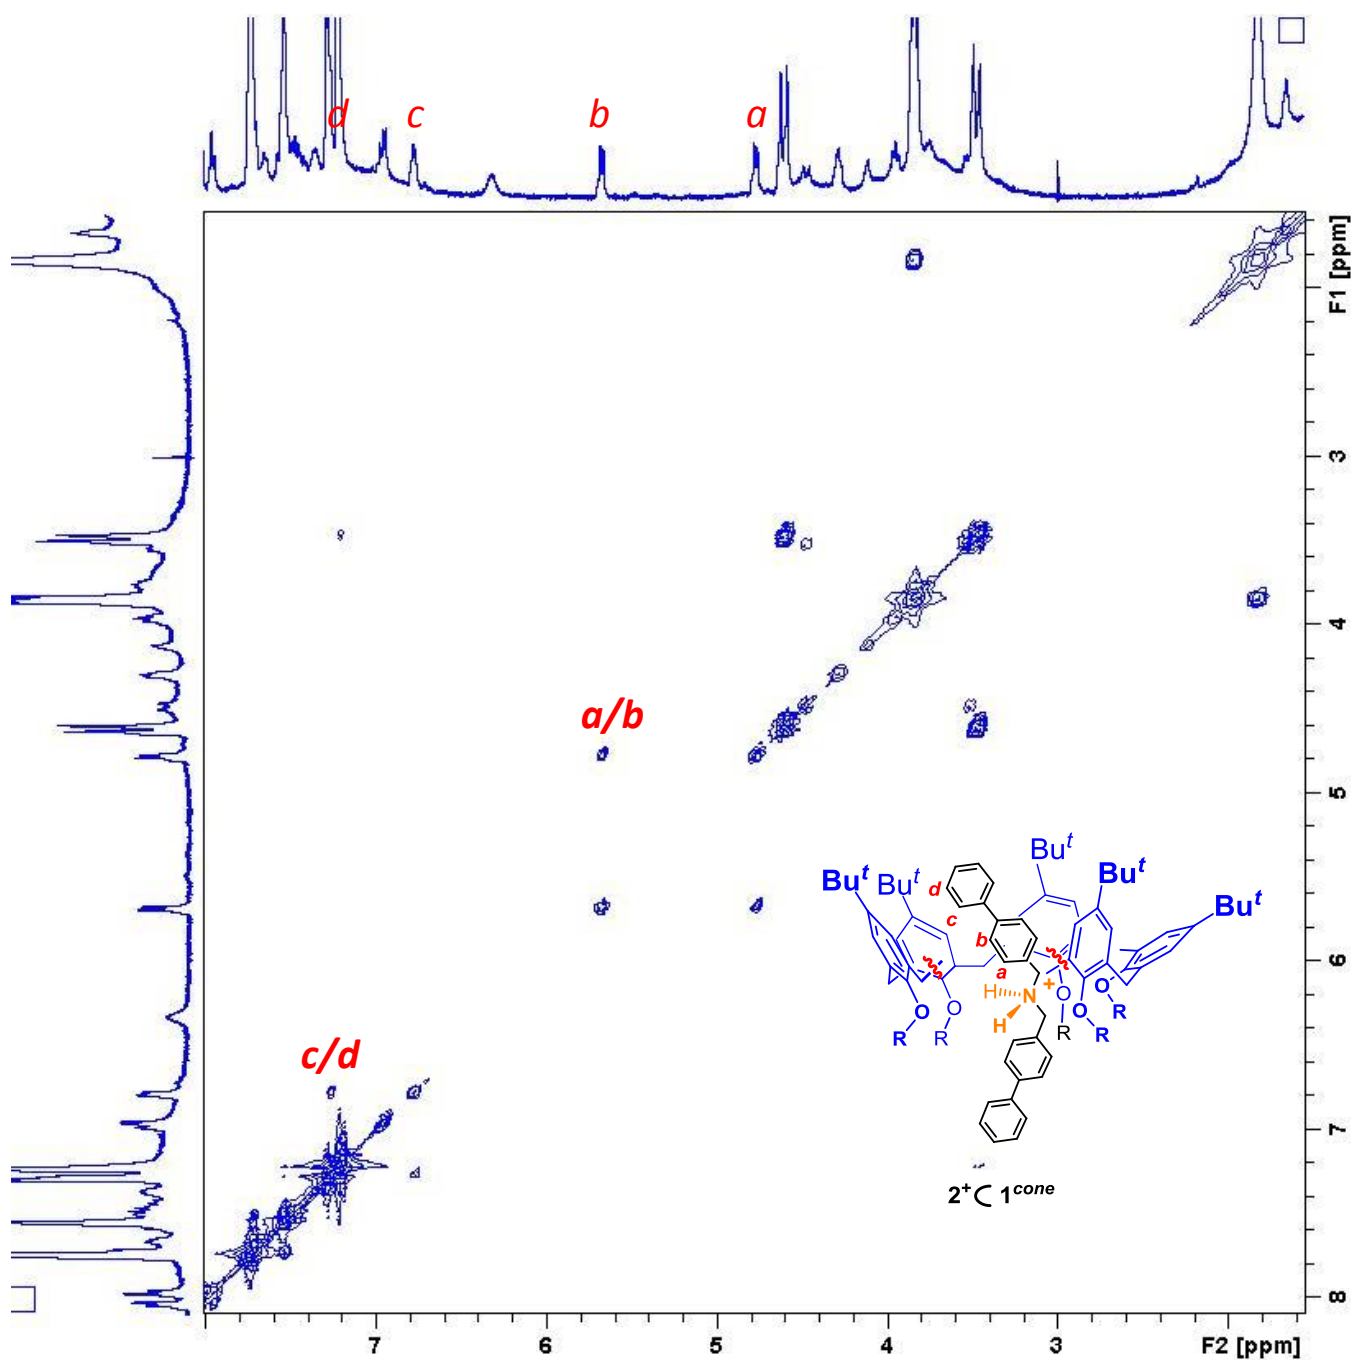

Figure S7: COSY spectrum (600 MHz,  $CDCl_3$ , 298 K) of a 1:1 mixture (0.003 M) of **1** and  $2^+ \cdot TFPB^-$  after 18 h by mixing,  $2^+ \subset 1^{cone}$ .



2D HSQC spectrum of  $2^+ \subset 1^{cone}$  atropoisomer at 298 K ( $CDCl_3$ , 600 MHz)

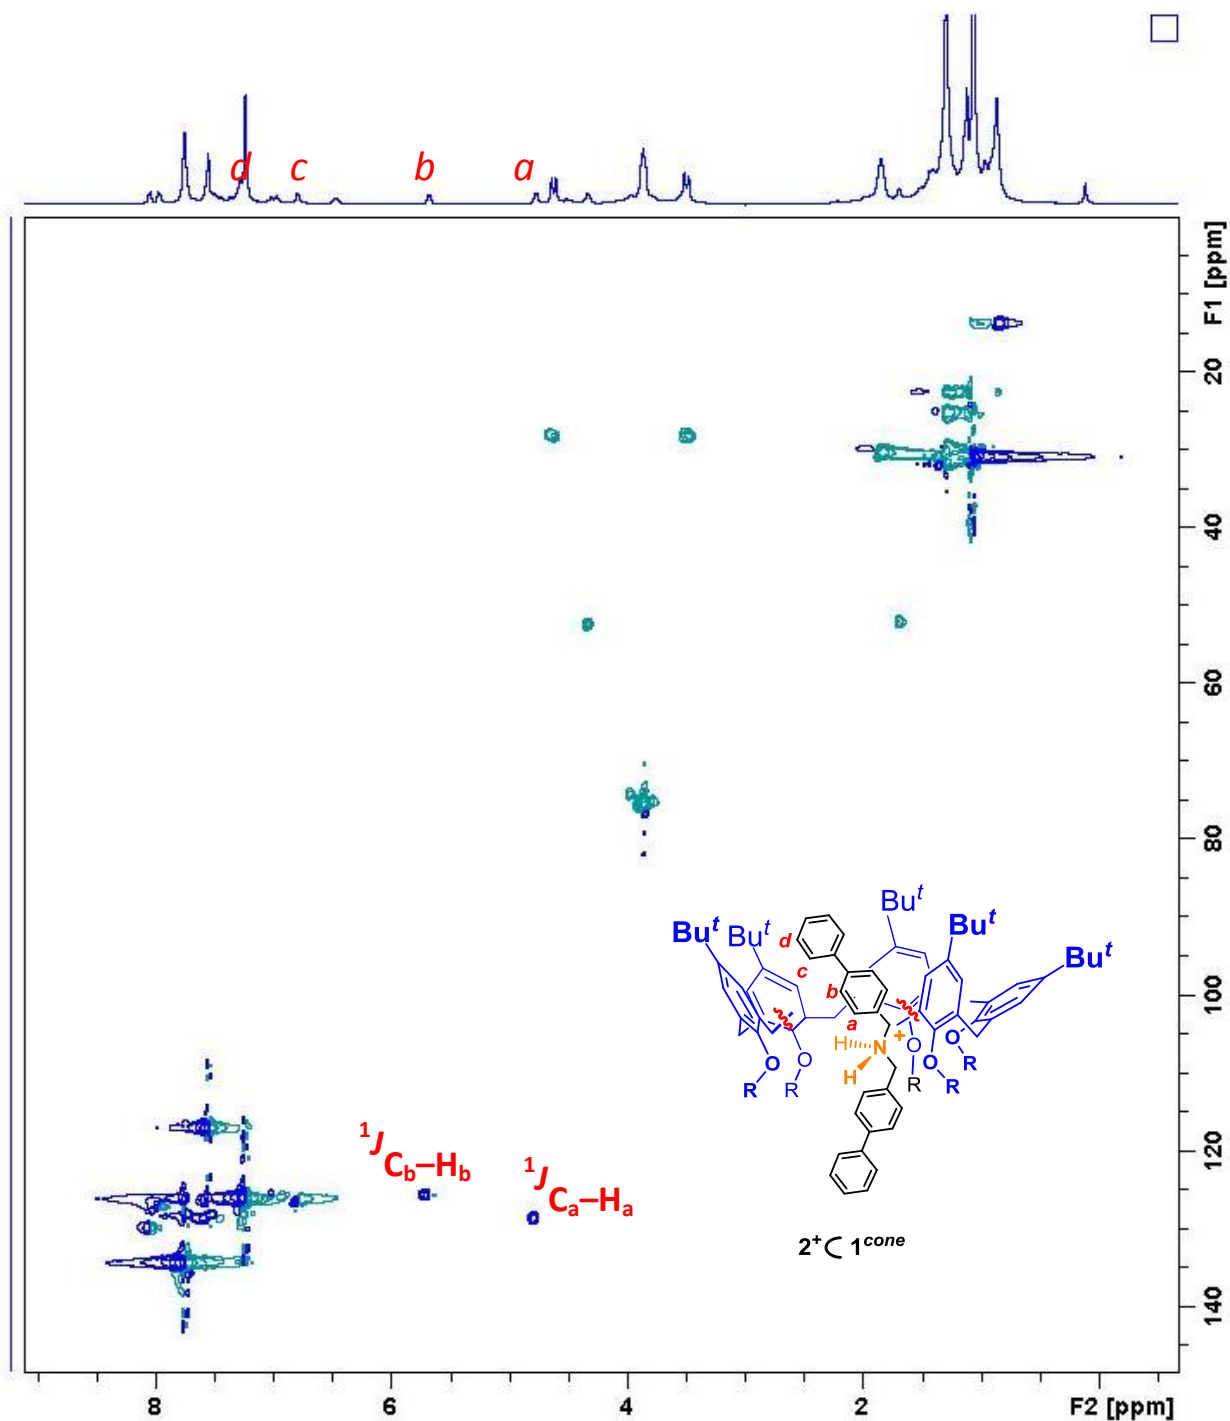

Figure S8: HSQC spectrum (600 MHz,  $CDCl_3$ , 298 K) of a 1:1 mixture (0.003 M) of **1** and  $2^+ \cdot TFPB^-$  after 18 h by mixing,  $2^+ \subset 1^{cone}$ .

2D COSY spectrum of  $3^+ \subset 1^{cone}$  atropisomer at 298 K ( $CDCl_3$ , 600 MHz)

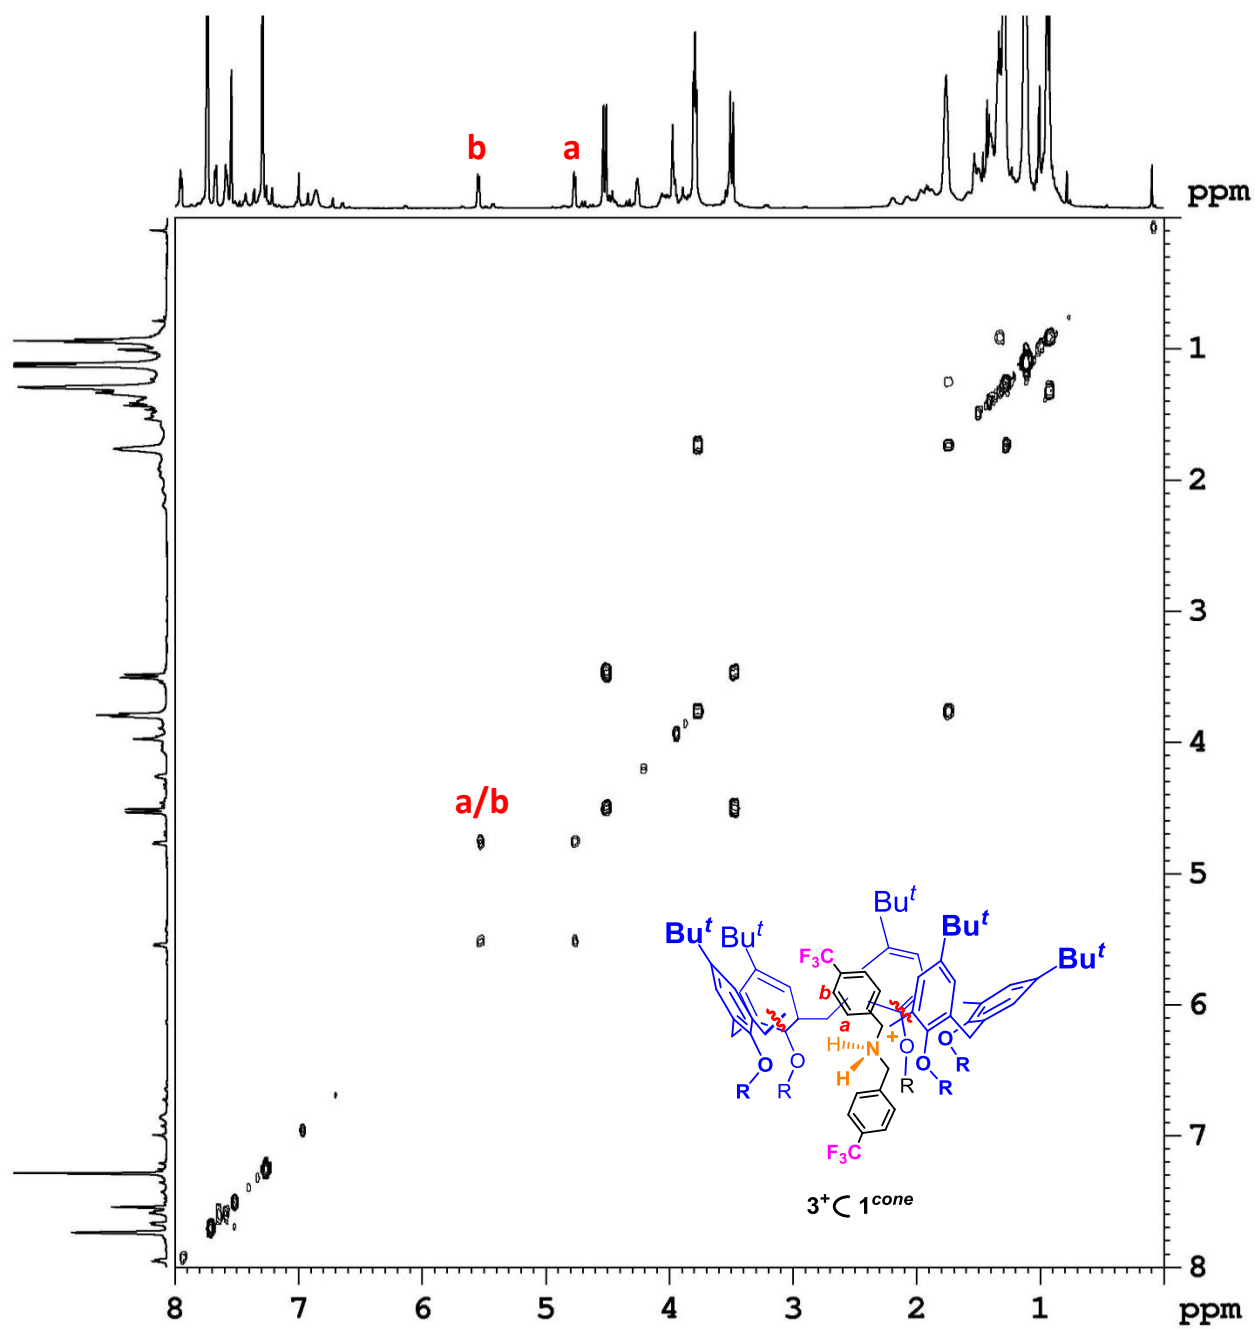

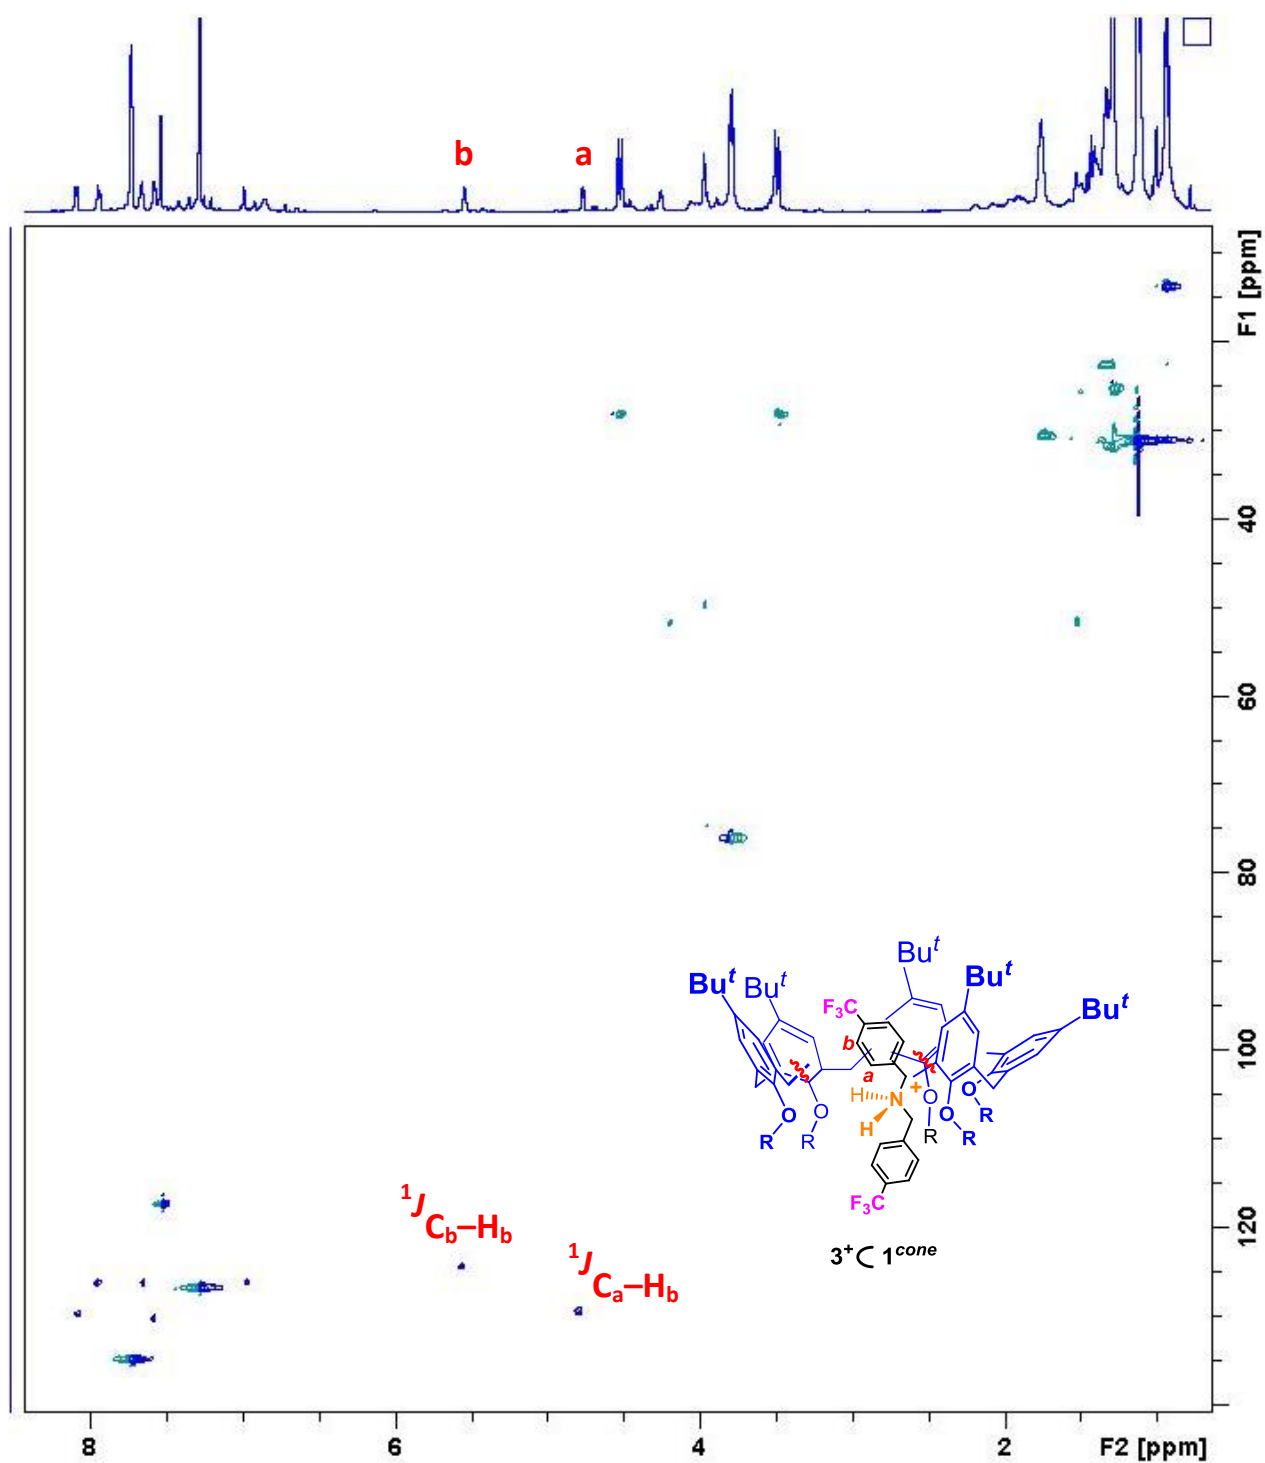

**Figure S10:** HSQC spectrum (600 MHz,  $\text{CDCl}_3$ , 298 K) of a 1:1 mixture (0.003 M) of **1** and  $3^+\cdot\text{TFPB}^-$  after 24 h,  $3^+ \text{C } 1^{\text{cone}}$ .

**Determination of apparent association constant values by quantitative  $^1\text{H}$  NMR analysis (for pseudorotaxanes  $2^+\subset 1^{\text{cone}}$ ,  $3^+\subset 1^{\text{cone}}$  and  $3^+\subset 1^{1,2,3\text{-alt}}$ ).**

The samples were prepared by dissolving calixarene-1 ( $3.0 \times 10^{-3}$  M) and the appropriate ammonium TFPB salt ( $2^+$  or  $3^+$ ) ( $3.0 \times 10^{-3}$  M) in  $\text{CDCl}_3$  (0.5 mL) containing 0.10  $\mu\text{L}$  of TCHE ( $d = 1.596$  g/mL) as an internal standard. The complex concentration [complex] was evaluated by integration of the  $^1\text{H}$  NMR signals of TCHE versus the signals of the pseudorotaxane. The following equation was used to obtain the moles of the complex:

$$\frac{G_a}{G_b} = \frac{F_a}{F_b} \times \frac{N_b}{N_a} \times \frac{M_a}{M_b}$$

in which:

$G_a$  = grams of TCHE;  $G_b$  = grams of pseudorotaxane

$F_a$  and  $F_b$  = areas of the signals of, TCHE and shielded aromatic protons of the axle.

$N_a$  and  $N_b$  = are the numbers of nuclei that cause the signals ( $N_a$  for TCHE;  $N_b$  for pseudorotaxane)

$M_a$  and  $M_b$  = are the molecular masses of TCHE (a) and pseudorotaxane (b)

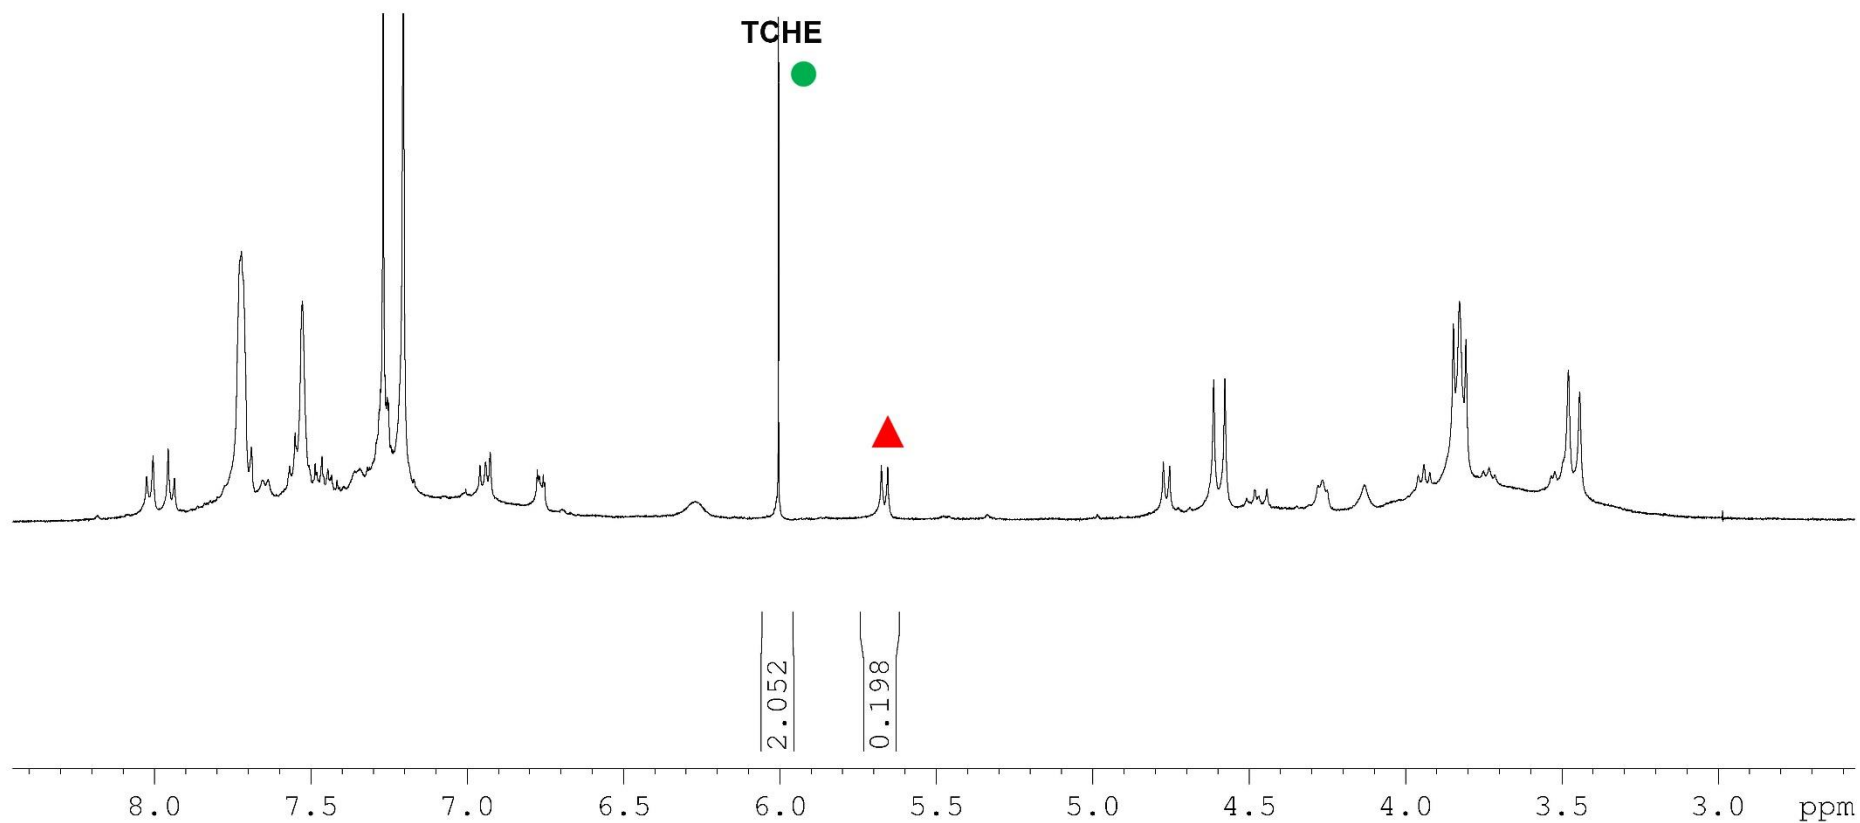

**Figure S11.** <sup>1</sup>H NMR spectra (600 MHz, CDCl<sub>3</sub>, 298 K) of a 1:1 mixture (0.003 M) of hexahexyloxycalix[6]arene **1** and **2<sup>+</sup>·TFPB<sup>-</sup>** in 0.5 mL of CDCl<sub>3</sub> containing 1.0 μL of TCHE after equilibration for 48 h at 298 K. The association constant  $K_a$  values were calculated by integration of complexed ArH signal of **2<sup>+</sup>·1<sup>cone</sup>** (▲) and signal of TCHE (●).

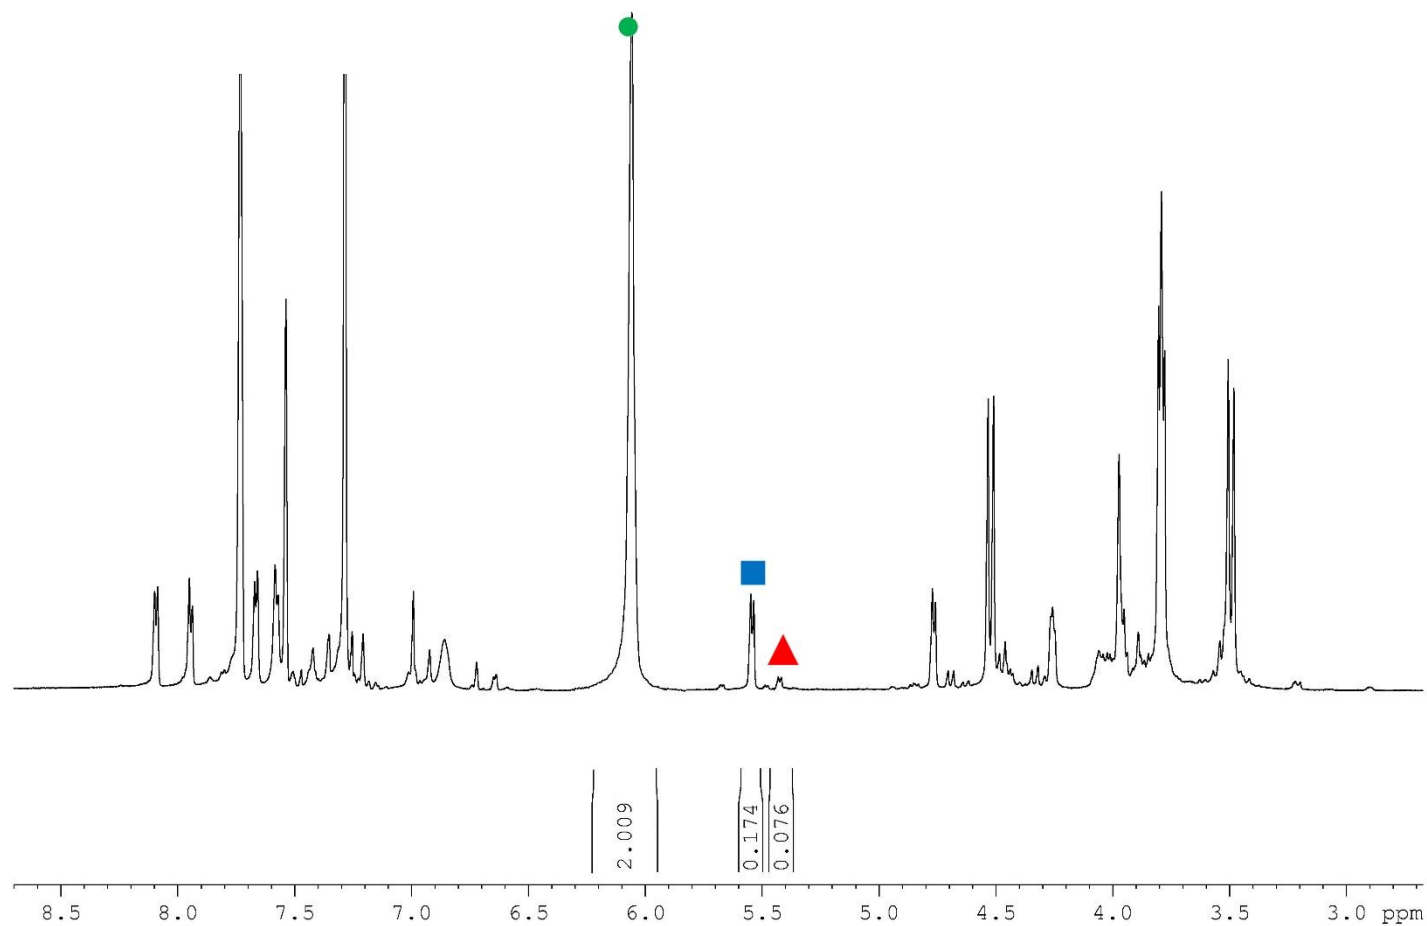

**Figure S12.**  $^1\text{H}$  NMR spectra (600 MHz,  $\text{CDCl}_3$ , 298 K) of a 1:1 mixture (0.0024 M) of hexahexyloxycalix[6]arene **1** and  $2^+\cdot\text{TFPB}^-$  in 0.5 mL of  $\text{CDCl}_3$  containing 0.10  $\mu\text{L}$  of TCHE after equilibration for 48 h at 298 K. The association constant  $K_a$  values were calculated by integration of complexed  $\text{ArH}$  signals of  $3^+\subset 1^{\text{cone}}$  (■),  $3^+\subset 1^{1,2,3\text{-alt}}$  (▲) and signal of TCHE (●).

## DFT Calculations.

Preliminary conformational searches have been performed by molecular mechanics calculations (Spartan 02). The minimized structures were optimized by DFT calculations (Gaussian 09) at B3LYP/6-31G(d,p) level of theory using Grimme's dispersion corrections

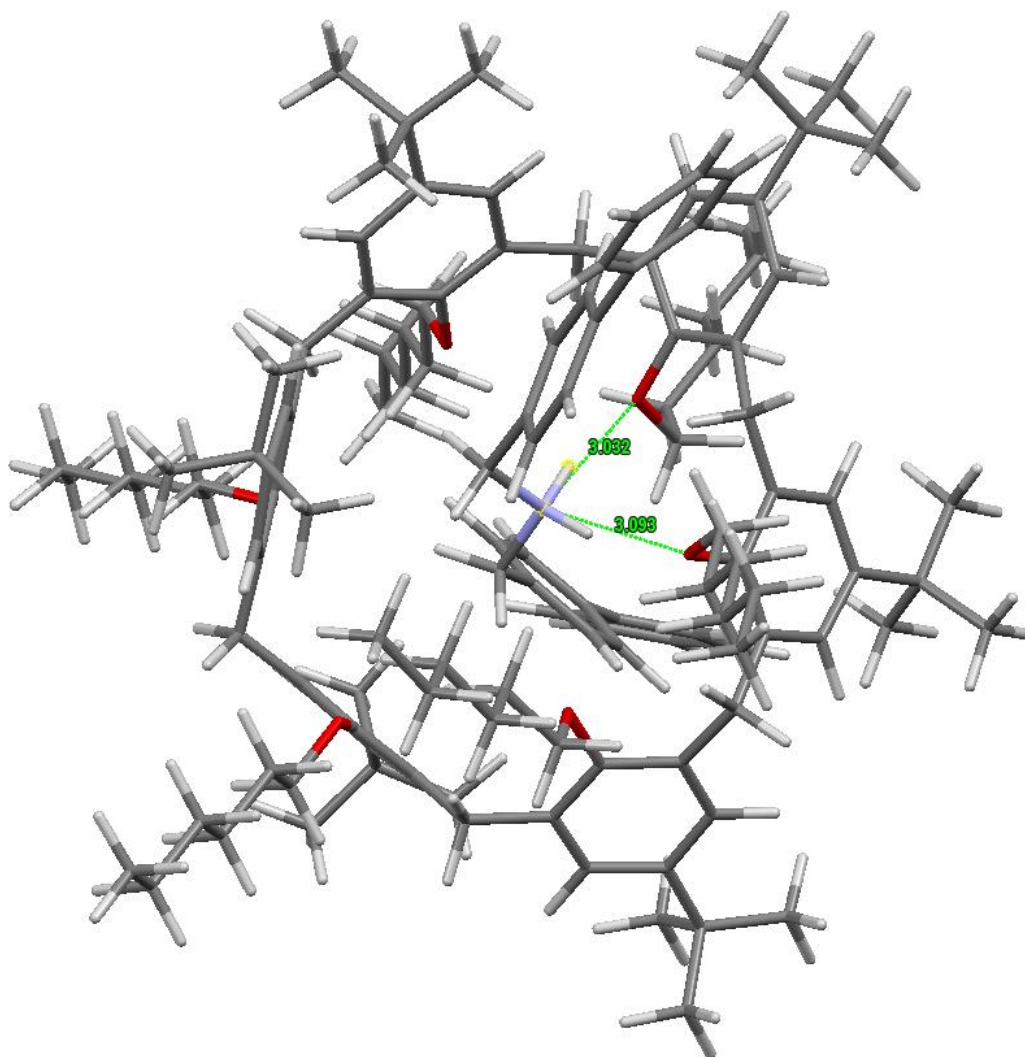

(IOp(3/124 = 3)).

**Figure S13:** DFT-optimized structure of the  $2^+ \text{C}1^{\text{cone}}$  atropisomer with H-bonds N...O distances indicated.

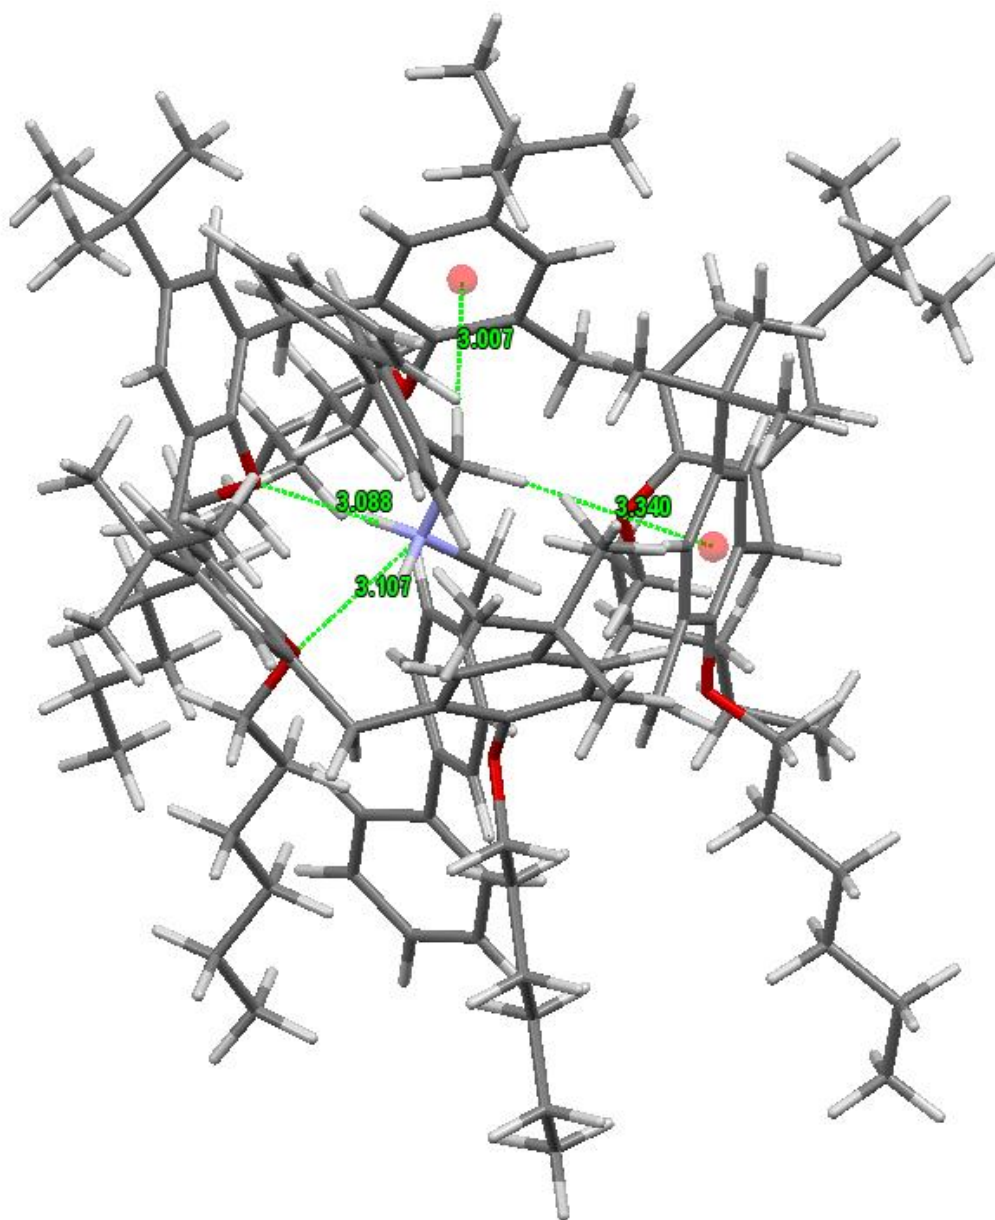

**Figure S14:** DFT-optimized structure of the  $2^+ \subset 1^{cone}$  atropisomer with C-H... $\pi$  distances indicated.



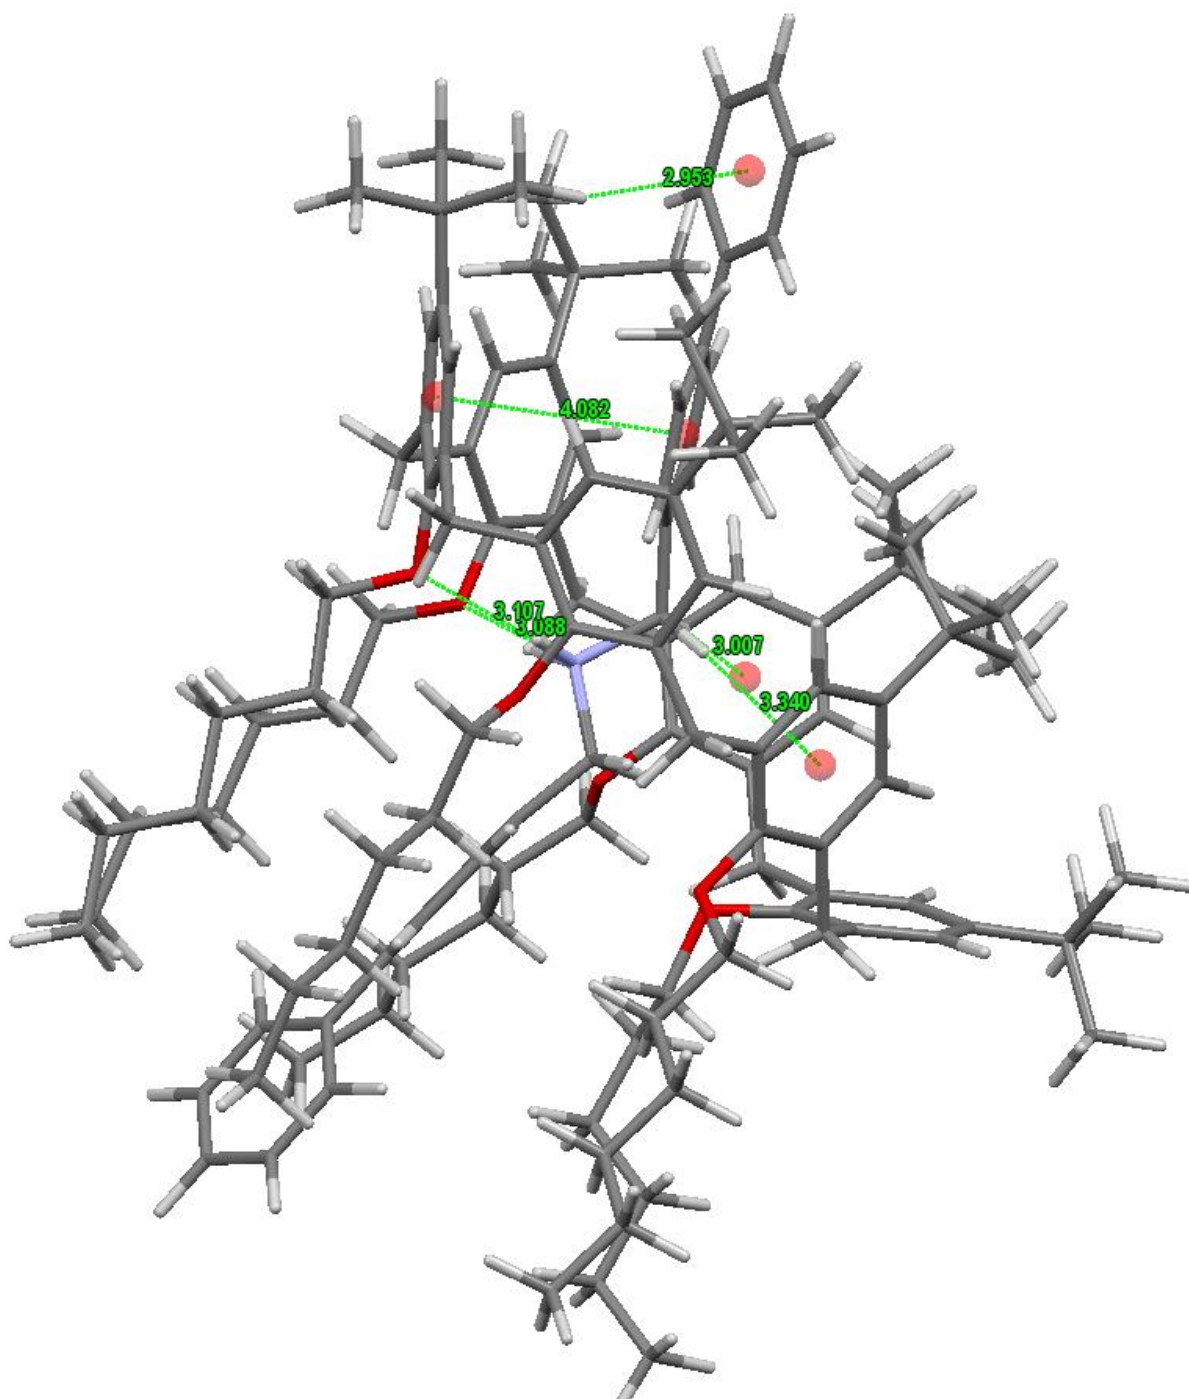

**Figure S15:** DFT-optimized structure of the  $2^+ \text{C1}^{\text{cone}}$  atropisomer with C-H... $\pi$  and  $\pi$ ... $\pi$  distances indicated.

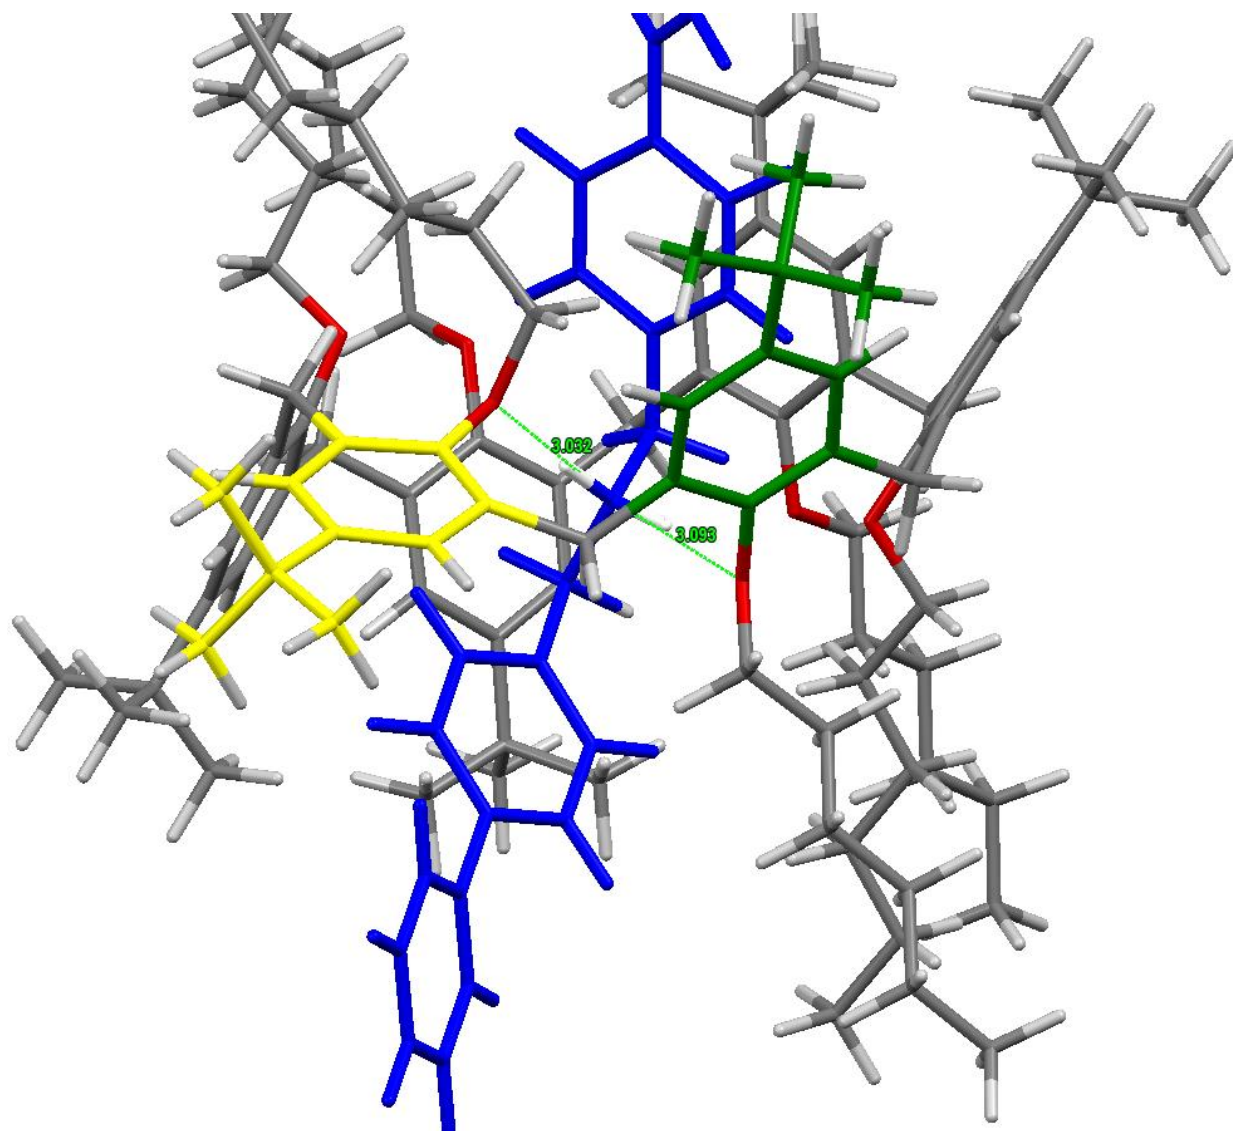

**Figure S16:** DFT-optimized structure of the  $2^+ C_1^{1,2,3-alt}$  atropisomer with H-bonds N...O distances indicated.

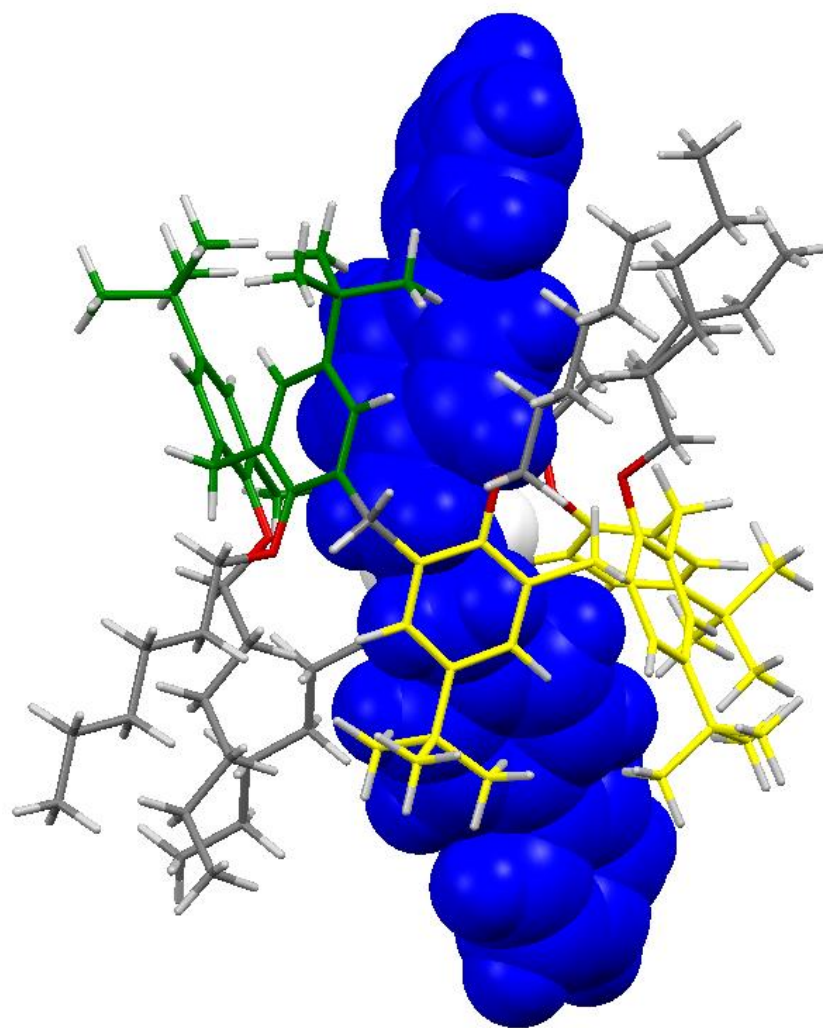

**Figure S17:** Different view of the DFT-optimized structure of the  $2^+ \subset 1^{1,2,3-alt}$  atropisomer.

## Atomic coordinates of $2^+ \subset 1^{cone}$

|        |    |     |     |   |        |        |        |      |      |   |
|--------|----|-----|-----|---|--------|--------|--------|------|------|---|
| HETATM | 1  | O1  | UNK | 1 | 0.141  | 4.032  | -0.402 | 1.00 | 0.00 | O |
| HETATM | 2  | O2  | UNK | 1 | -2.211 | 2.787  | 2.878  | 1.00 | 0.00 | O |
| HETATM | 3  | O3  | UNK | 1 | -1.376 | -4.335 | -0.395 | 1.00 | 0.00 | O |
| HETATM | 4  | O4  | UNK | 1 | -2.721 | -1.382 | 2.257  | 1.00 | 0.00 | O |
| HETATM | 5  | O5  | UNK | 1 | 0.881  | -2.257 | -2.796 | 1.00 | 0.00 | O |
| HETATM | 6  | C6  | UNK | 1 | -2.446 | -1.914 | 3.508  | 1.00 | 0.00 | C |
| HETATM | 7  | C7  | UNK | 1 | 1.273  | 1.248  | 4.666  | 1.00 | 0.00 | C |
| HETATM | 8  | C8  | UNK | 1 | -1.063 | 2.288  | 3.479  | 1.00 | 0.00 | C |
| HETATM | 9  | C9  | UNK | 1 | 0.034  | 0.622  | 4.834  | 1.00 | 0.00 | C |
| HETATM | 10 | C10 | UNK | 1 | 1.312  | 2.393  | 3.856  | 1.00 | 0.00 | C |
| HETATM | 11 | C11 | UNK | 1 | -2.420 | -1.070 | 4.635  | 1.00 | 0.00 | C |
| HETATM | 12 | C12 | UNK | 1 | -2.014 | -4.169 | 2.406  | 1.00 | 0.00 | C |
| HETATM | 13 | C13 | UNK | 1 | 2.196  | -2.720 | -2.657 | 1.00 | 0.00 | C |
| HETATM | 14 | C14 | UNK | 1 | 0.985  | -4.628 | 0.024  | 1.00 | 0.00 | C |
| HETATM | 15 | C15 | UNK | 1 | -2.491 | 0.441  | 4.500  | 1.00 | 0.00 | C |
| HETATM | 16 | C16 | UNK | 1 | -0.325 | -4.438 | 0.510  | 1.00 | 0.00 | C |
| HETATM | 17 | C17 | UNK | 1 | -2.250 | -1.653 | 5.893  | 1.00 | 0.00 | C |
| HETATM | 18 | C18 | UNK | 1 | 3.738  | 4.723  | 0.028  | 1.00 | 0.00 | C |
| HETATM | 19 | C19 | UNK | 1 | -0.581 | -4.338 | 1.890  | 1.00 | 0.00 | C |
| HETATM | 20 | C20 | UNK | 1 | 1.435  | 4.453  | 1.590  | 1.00 | 0.00 | C |
| HETATM | 21 | C21 | UNK | 1 | 3.817  | 5.028  | 1.389  | 1.00 | 0.00 | C |
| HETATM | 22 | C22 | UNK | 1 | 2.982  | -0.658 | -3.929 | 1.00 | 0.00 | C |
| HETATM | 23 | C23 | UNK | 1 | -1.141 | 1.118  | 4.255  | 1.00 | 0.00 | C |
| HETATM | 24 | C24 | UNK | 1 | 0.213  | 4.246  | 2.466  | 1.00 | 0.00 | C |
| HETATM | 25 | C25 | UNK | 1 | 1.804  | -4.714 | 2.339  | 1.00 | 0.00 | C |
| HETATM | 26 | C26 | UNK | 1 | 1.246  | -4.781 | -1.475 | 1.00 | 0.00 | C |
| HETATM | 27 | C27 | UNK | 1 | 0.497  | -4.471 | 2.774  | 1.00 | 0.00 | C |
| HETATM | 28 | C28 | UNK | 1 | 0.170  | 2.936  | 3.262  | 1.00 | 0.00 | C |
| HETATM | 29 | C29 | UNK | 1 | 3.701  | -4.488 | -2.049 | 1.00 | 0.00 | C |
| HETATM | 30 | C30 | UNK | 1 | 2.538  | 4.342  | -0.595 | 1.00 | 0.00 | C |
| HETATM | 31 | C31 | UNK | 1 | 4.540  | -2.533 | -3.146 | 1.00 | 0.00 | C |
| HETATM | 32 | C32 | UNK | 1 | -2.163 | -3.282 | 3.629  | 1.00 | 0.00 | C |
| HETATM | 33 | C33 | UNK | 1 | 3.256  | -1.969 | -3.189 | 1.00 | 0.00 | C |
| HETATM | 34 | C34 | UNK | 1 | 4.790  | -3.800 | -2.608 | 1.00 | 0.00 | C |
| HETATM | 35 | C35 | UNK | 1 | 2.402  | -3.973 | -2.049 | 1.00 | 0.00 | C |
| HETATM | 36 | C36 | UNK | 1 | 1.380  | 4.257  | 0.194  | 1.00 | 0.00 | C |
| HETATM | 37 | C37 | UNK | 1 | 2.021  | -4.765 | 0.954  | 1.00 | 0.00 | C |
| HETATM | 38 | C38 | UNK | 1 | -2.062 | -3.033 | 6.072  | 1.00 | 0.00 | C |
| HETATM | 39 | C39 | UNK | 1 | -1.996 | -3.817 | 4.916  | 1.00 | 0.00 | C |
| HETATM | 40 | C40 | UNK | 1 | 2.648  | 4.864  | 2.149  | 1.00 | 0.00 | C |
| HETATM | 41 | C41 | UNK | 1 | 2.491  | 4.090  | -2.102 | 1.00 | 0.00 | C |
| HETATM | 42 | C42 | UNK | 1 | 4.726  | 3.143  | -2.846 | 1.00 | 0.00 | C |
| HETATM | 43 | C43 | UNK | 1 | 5.563  | 2.141  | -3.361 | 1.00 | 0.00 | C |
| HETATM | 44 | C44 | UNK | 1 | 4.980  | 0.900  | -3.633 | 1.00 | 0.00 | C |
| HETATM | 45 | C45 | UNK | 1 | 3.613  | 0.648  | -3.447 | 1.00 | 0.00 | C |
| HETATM | 46 | C46 | UNK | 1 | 2.814  | 1.693  | -2.954 | 1.00 | 0.00 | C |
| HETATM | 47 | C47 | UNK | 1 | 3.361  | 2.947  | -2.620 | 1.00 | 0.00 | C |
| HETATM | 48 | O48 | UNK | 1 | 1.427  | 1.522  | -2.864 | 1.00 | 0.00 | O |
| HETATM | 49 | C49 | UNK | 1 | 0.322  | -2.701 | -4.064 | 1.00 | 0.00 | C |
| HETATM | 50 | H50 | UNK | 1 | -0.041 | -0.277 | 5.432  | 1.00 | 0.00 | H |
| HETATM | 51 | H51 | UNK | 1 | 2.261  | 2.888  | 3.689  | 1.00 | 0.00 | H |
| HETATM | 52 | H52 | UNK | 1 | -2.621 | -3.781 | 1.590  | 1.00 | 0.00 | H |
| HETATM | 53 | H53 | UNK | 1 | -2.407 | -5.165 | 2.651  | 1.00 | 0.00 | H |
| HETATM | 54 | H54 | UNK | 1 | -2.921 | 0.848  | 5.425  | 1.00 | 0.00 | H |
| HETATM | 55 | H55 | UNK | 1 | -3.160 | 0.741  | 3.693  | 1.00 | 0.00 | H |

|        |     |      |     |   |        |        |        |      |      |   |
|--------|-----|------|-----|---|--------|--------|--------|------|------|---|
| HETATM | 56  | H56  | UNK | 1 | -4.104 | -0.287 | 1.249  | 1.00 | 0.00 | H |
| HETATM | 57  | H57  | UNK | 1 | 4.622  | 4.811  | -0.590 | 1.00 | 0.00 | H |
| HETATM | 58  | H58  | UNK | 1 | 0.157  | 5.077  | 3.183  | 1.00 | 0.00 | H |
| HETATM | 59  | H59  | UNK | 1 | -0.690 | 4.292  | 1.859  | 1.00 | 0.00 | H |
| HETATM | 60  | H60  | UNK | 1 | -2.474 | -5.982 | 0.262  | 1.00 | 0.00 | H |
| HETATM | 61  | H61  | UNK | 1 | 0.290  | -4.396 | 3.834  | 1.00 | 0.00 | H |
| HETATM | 62  | H62  | UNK | 1 | 3.852  | -5.482 | -1.638 | 1.00 | 0.00 | H |
| HETATM | 63  | H63  | UNK | 1 | 3.023  | -4.943 | 0.578  | 1.00 | 0.00 | H |
| HETATM | 64  | H64  | UNK | 1 | -1.829 | -4.885 | 4.998  | 1.00 | 0.00 | H |
| HETATM | 65  | H65  | UNK | 1 | 2.805  | 5.008  | -2.613 | 1.00 | 0.00 | H |
| HETATM | 66  | H66  | UNK | 1 | 1.454  | 3.906  | -2.375 | 1.00 | 0.00 | H |
| HETATM | 67  | H67  | UNK | 1 | 1.905  | -0.516 | -3.940 | 1.00 | 0.00 | H |
| HETATM | 68  | H68  | UNK | 1 | 3.297  | -0.803 | -4.971 | 1.00 | 0.00 | H |
| HETATM | 69  | H69  | UNK | 1 | 0.324  | -4.527 | -1.997 | 1.00 | 0.00 | H |
| HETATM | 70  | H70  | UNK | 1 | 1.447  | -5.840 | -1.678 | 1.00 | 0.00 | H |
| HETATM | 71  | H71  | UNK | 1 | 5.589  | 0.113  | -4.061 | 1.00 | 0.00 | H |
| HETATM | 72  | H72  | UNK | 1 | 5.354  | -1.974 | -3.587 | 1.00 | 0.00 | H |
| HETATM | 73  | H73  | UNK | 1 | 2.667  | 5.087  | 3.212  | 1.00 | 0.00 | H |
| HETATM | 74  | H74  | UNK | 1 | -2.264 | -0.997 | 6.760  | 1.00 | 0.00 | H |
| HETATM | 75  | H75  | UNK | 1 | 5.138  | 4.129  | -2.657 | 1.00 | 0.00 | H |
| HETATM | 76  | H76  | UNK | 1 | 0.437  | -3.790 | -4.126 | 1.00 | 0.00 | H |
| HETATM | 77  | H77  | UNK | 1 | 0.913  | -2.264 | -4.878 | 1.00 | 0.00 | H |
| HETATM | 78  | C78  | UNK | 1 | -2.966 | 3.717  | 3.676  | 1.00 | 0.00 | C |
| HETATM | 79  | C79  | UNK | 1 | -4.116 | -1.059 | 2.023  | 1.00 | 0.00 | C |
| HETATM | 80  | C80  | UNK | 1 | -0.509 | 5.276  | -0.756 | 1.00 | 0.00 | C |
| HETATM | 81  | C81  | UNK | 1 | 0.774  | 1.924  | -4.097 | 1.00 | 0.00 | C |
| HETATM | 82  | C82  | UNK | 1 | -2.050 | -5.581 | -0.668 | 1.00 | 0.00 | C |
| HETATM | 83  | H83  | UNK | 1 | 0.009  | 5.721  | -1.617 | 1.00 | 0.00 | H |
| HETATM | 84  | H84  | UNK | 1 | -3.227 | 3.256  | 4.638  | 1.00 | 0.00 | H |
| HETATM | 85  | H85  | UNK | 1 | -4.541 | -0.626 | 2.933  | 1.00 | 0.00 | H |
| HETATM | 86  | H86  | UNK | 1 | -0.416 | 5.980  | 0.081  | 1.00 | 0.00 | H |
| HETATM | 87  | H87  | UNK | 1 | 1.186  | 2.891  | -4.410 | 1.00 | 0.00 | H |
| HETATM | 88  | H88  | UNK | 1 | 1.020  | 1.198  | -4.882 | 1.00 | 0.00 | H |
| HETATM | 89  | H89  | UNK | 1 | -1.324 | -6.314 | -1.044 | 1.00 | 0.00 | H |
| HETATM | 90  | H90  | UNK | 1 | -2.353 | 4.604  | 3.890  | 1.00 | 0.00 | H |
| HETATM | 91  | C109 | UNK | 1 | 6.169  | -4.484 | -2.682 | 1.00 | 0.00 | C |
| HETATM | 92  | C110 | UNK | 1 | 6.646  | -4.887 | -1.268 | 1.00 | 0.00 | C |
| HETATM | 93  | H111 | UNK | 1 | 6.779  | -4.009 | -0.628 | 1.00 | 0.00 | H |
| HETATM | 94  | H112 | UNK | 1 | 5.941  | -5.560 | -0.771 | 1.00 | 0.00 | H |
| HETATM | 95  | H113 | UNK | 1 | 7.609  | -5.406 | -1.325 | 1.00 | 0.00 | H |
| HETATM | 96  | C114 | UNK | 1 | 6.048  | -5.758 | -3.555 | 1.00 | 0.00 | C |
| HETATM | 97  | H115 | UNK | 1 | 5.339  | -6.476 | -3.132 | 1.00 | 0.00 | H |
| HETATM | 98  | H116 | UNK | 1 | 5.711  | -5.509 | -4.566 | 1.00 | 0.00 | H |
| HETATM | 99  | H117 | UNK | 1 | 7.020  | -6.258 | -3.634 | 1.00 | 0.00 | H |
| HETATM | 100 | C118 | UNK | 1 | 7.241  | -3.576 | -3.314 | 1.00 | 0.00 | C |
| HETATM | 101 | H119 | UNK | 1 | 8.203  | -4.098 | -3.330 | 1.00 | 0.00 | H |
| HETATM | 102 | H120 | UNK | 1 | 6.995  | -3.312 | -4.347 | 1.00 | 0.00 | H |
| HETATM | 103 | H121 | UNK | 1 | 7.378  | -2.649 | -2.748 | 1.00 | 0.00 | H |
| HETATM | 104 | C122 | UNK | 1 | -1.934 | -3.616 | 7.492  | 1.00 | 0.00 | C |
| HETATM | 105 | C123 | UNK | 1 | -1.730 | -5.143 | 7.481  | 1.00 | 0.00 | C |
| HETATM | 106 | H124 | UNK | 1 | -2.570 | -5.664 | 7.010  | 1.00 | 0.00 | H |
| HETATM | 107 | H125 | UNK | 1 | -0.811 | -5.430 | 6.959  | 1.00 | 0.00 | H |
| HETATM | 108 | H126 | UNK | 1 | -1.651 | -5.511 | 8.508  | 1.00 | 0.00 | H |
| HETATM | 109 | C127 | UNK | 1 | -0.725 | -2.974 | 8.212  | 1.00 | 0.00 | C |
| HETATM | 110 | H128 | UNK | 1 | 0.207  | -3.180 | 7.674  | 1.00 | 0.00 | H |
| HETATM | 111 | H129 | UNK | 1 | -0.829 | -1.889 | 8.301  | 1.00 | 0.00 | H |
| HETATM | 112 | H130 | UNK | 1 | -0.626 | -3.380 | 9.225  | 1.00 | 0.00 | H |
| HETATM | 113 | C131 | UNK | 1 | -3.225 | -3.307 | 8.287  | 1.00 | 0.00 | C |
| HETATM | 114 | H132 | UNK | 1 | -3.151 | -3.708 | 9.304  | 1.00 | 0.00 | H |
| HETATM | 115 | H133 | UNK | 1 | -3.407 | -2.231 | 8.366  | 1.00 | 0.00 | H |
| HETATM | 116 | H134 | UNK | 1 | -4.099 | -3.760 | 7.807  | 1.00 | 0.00 | H |
| HETATM | 117 | C135 | UNK | 1 | 2.969  | -4.982 | 3.313  | 1.00 | 0.00 | C |

|        |     |      |     |   |        |        |        |      |      |   |
|--------|-----|------|-----|---|--------|--------|--------|------|------|---|
| HETATM | 118 | C136 | UNK | 1 | 2.548  | -4.822 | 4.786  | 1.00 | 0.00 | C |
| HETATM | 119 | H137 | UNK | 1 | 2.189  | -3.810 | 5.001  | 1.00 | 0.00 | H |
| HETATM | 120 | H138 | UNK | 1 | 1.763  | -5.531 | 5.067  | 1.00 | 0.00 | H |
| HETATM | 121 | H139 | UNK | 1 | 3.407  | -5.012 | 5.436  | 1.00 | 0.00 | H |
| HETATM | 122 | C140 | UNK | 1 | 4.138  | -4.010 | 3.039  | 1.00 | 0.00 | C |
| HETATM | 123 | H141 | UNK | 1 | 3.830  | -2.968 | 3.170  | 1.00 | 0.00 | H |
| HETATM | 124 | H142 | UNK | 1 | 4.963  | -4.207 | 3.733  | 1.00 | 0.00 | H |
| HETATM | 125 | H143 | UNK | 1 | 4.533  | -4.117 | 2.025  | 1.00 | 0.00 | H |
| HETATM | 126 | C144 | UNK | 1 | 3.461  | -6.436 | 3.109  | 1.00 | 0.00 | C |
| HETATM | 127 | H145 | UNK | 1 | 4.288  | -6.658 | 3.791  | 1.00 | 0.00 | H |
| HETATM | 128 | H146 | UNK | 1 | 2.657  | -7.153 | 3.304  | 1.00 | 0.00 | H |
| HETATM | 129 | H147 | UNK | 1 | 3.817  | -6.603 | 2.087  | 1.00 | 0.00 | H |
| HETATM | 130 | C148 | UNK | 1 | 2.556  | 0.751  | 5.361  | 1.00 | 0.00 | C |
| HETATM | 131 | C149 | UNK | 1 | 2.310  | -0.511 | 6.209  | 1.00 | 0.00 | C |
| HETATM | 132 | H150 | UNK | 1 | 1.942  | -1.344 | 5.601  | 1.00 | 0.00 | H |
| HETATM | 133 | H151 | UNK | 1 | 3.247  | -0.829 | 6.675  | 1.00 | 0.00 | H |
| HETATM | 134 | H152 | UNK | 1 | 1.588  | -0.330 | 7.012  | 1.00 | 0.00 | H |
| HETATM | 135 | C153 | UNK | 1 | 3.085  | 1.862  | 6.299  | 1.00 | 0.00 | C |
| HETATM | 136 | H154 | UNK | 1 | 2.342  | 2.119  | 7.061  | 1.00 | 0.00 | H |
| HETATM | 137 | H155 | UNK | 1 | 3.995  | 1.529  | 6.810  | 1.00 | 0.00 | H |
| HETATM | 138 | H156 | UNK | 1 | 3.329  | 2.776  | 5.749  | 1.00 | 0.00 | H |
| HETATM | 139 | C157 | UNK | 1 | 3.637  | 0.419  | 4.308  | 1.00 | 0.00 | C |
| HETATM | 140 | H158 | UNK | 1 | 4.560  | 0.094  | 4.800  | 1.00 | 0.00 | H |
| HETATM | 141 | H159 | UNK | 1 | 3.308  | -0.388 | 3.644  | 1.00 | 0.00 | H |
| HETATM | 142 | H160 | UNK | 1 | 3.881  | 1.281  | 3.681  | 1.00 | 0.00 | H |
| HETATM | 143 | C161 | UNK | 1 | 5.099  | 5.557  | 2.060  | 1.00 | 0.00 | C |
| HETATM | 144 | C162 | UNK | 1 | 6.290  | 5.621  | 1.085  | 1.00 | 0.00 | C |
| HETATM | 145 | H163 | UNK | 1 | 6.093  | 6.293  | 0.243  | 1.00 | 0.00 | H |
| HETATM | 146 | H164 | UNK | 1 | 7.172  | 6.005  | 1.607  | 1.00 | 0.00 | H |
| HETATM | 147 | H165 | UNK | 1 | 6.551  | 4.636  | 0.683  | 1.00 | 0.00 | H |
| HETATM | 148 | C166 | UNK | 1 | 4.836  | 6.986  | 2.591  | 1.00 | 0.00 | C |
| HETATM | 149 | H167 | UNK | 1 | 4.570  | 7.665  | 1.775  | 1.00 | 0.00 | H |
| HETATM | 150 | H168 | UNK | 1 | 4.020  | 7.003  | 3.321  | 1.00 | 0.00 | H |
| HETATM | 151 | H169 | UNK | 1 | 5.731  | 7.381  | 3.083  | 1.00 | 0.00 | H |
| HETATM | 152 | C170 | UNK | 1 | 5.493  | 4.642  | 3.243  | 1.00 | 0.00 | C |
| HETATM | 153 | H171 | UNK | 1 | 6.415  | 5.002  | 3.712  | 1.00 | 0.00 | H |
| HETATM | 154 | H172 | UNK | 1 | 4.720  | 4.617  | 4.017  | 1.00 | 0.00 | H |
| HETATM | 155 | H173 | UNK | 1 | 5.662  | 3.613  | 2.908  | 1.00 | 0.00 | H |
| HETATM | 156 | C174 | UNK | 1 | 7.035  | 2.464  | -3.689 | 1.00 | 0.00 | C |
| HETATM | 157 | C175 | UNK | 1 | 7.069  | 3.492  | -4.845 | 1.00 | 0.00 | C |
| HETATM | 158 | H176 | UNK | 1 | 6.577  | 3.096  | -5.740 | 1.00 | 0.00 | H |
| HETATM | 159 | H177 | UNK | 1 | 6.565  | 4.425  | -4.573 | 1.00 | 0.00 | H |
| HETATM | 160 | H178 | UNK | 1 | 8.104  | 3.736  | -5.107 | 1.00 | 0.00 | H |
| HETATM | 161 | C179 | UNK | 1 | 7.744  | 3.064  | -2.454 | 1.00 | 0.00 | C |
| HETATM | 162 | H180 | UNK | 1 | 7.268  | 3.990  | -2.116 | 1.00 | 0.00 | H |
| HETATM | 163 | H181 | UNK | 1 | 7.749  | 2.359  | -1.618 | 1.00 | 0.00 | H |
| HETATM | 164 | H182 | UNK | 1 | 8.784  | 3.304  | -2.699 | 1.00 | 0.00 | H |
| HETATM | 165 | C183 | UNK | 1 | 7.823  | 1.215  | -4.130 | 1.00 | 0.00 | C |
| HETATM | 166 | H184 | UNK | 1 | 8.863  | 1.490  | -4.327 | 1.00 | 0.00 | H |
| HETATM | 167 | H185 | UNK | 1 | 7.827  | 0.445  | -3.352 | 1.00 | 0.00 | H |
| HETATM | 168 | H186 | UNK | 1 | 7.423  | 0.779  | -5.051 | 1.00 | 0.00 | H |
| HETATM | 169 | C187 | UNK | 1 | -1.138 | -2.314 | -4.198 | 1.00 | 0.00 | C |
| HETATM | 170 | H188 | UNK | 1 | -1.708 | -2.768 | -3.381 | 1.00 | 0.00 | H |
| HETATM | 171 | H189 | UNK | 1 | -1.245 | -1.228 | -4.094 | 1.00 | 0.00 | H |
| HETATM | 172 | C190 | UNK | 1 | -1.699 | -2.770 | -5.554 | 1.00 | 0.00 | C |
| HETATM | 173 | H191 | UNK | 1 | -1.114 | -2.311 | -6.363 | 1.00 | 0.00 | H |
| HETATM | 174 | H192 | UNK | 1 | -1.560 | -3.855 | -5.659 | 1.00 | 0.00 | H |
| HETATM | 175 | C193 | UNK | 1 | -3.181 | -2.433 | -5.753 | 1.00 | 0.00 | C |
| HETATM | 176 | H194 | UNK | 1 | -3.770 | -2.904 | -4.953 | 1.00 | 0.00 | H |
| HETATM | 177 | H195 | UNK | 1 | -3.325 | -1.348 | -5.643 | 1.00 | 0.00 | H |
| HETATM | 178 | C196 | UNK | 1 | -3.729 | -2.880 | -7.114 | 1.00 | 0.00 | C |
| HETATM | 179 | H197 | UNK | 1 | -3.140 | -2.410 | -7.913 | 1.00 | 0.00 | H |

|        |     |      |     |   |         |        |        |      |      |   |
|--------|-----|------|-----|---|---------|--------|--------|------|------|---|
| HETATM | 180 | H198 | UNK | 1 | -3.581  | -3.962 | -7.225 | 1.00 | 0.00 | H |
| HETATM | 181 | C199 | UNK | 1 | -5.211  | -2.545 | -7.308 | 1.00 | 0.00 | C |
| HETATM | 182 | H200 | UNK | 1 | -5.831  | -3.034 | -6.548 | 1.00 | 0.00 | H |
| HETATM | 183 | H201 | UNK | 1 | -5.385  | -1.465 | -7.238 | 1.00 | 0.00 | H |
| HETATM | 184 | H202 | UNK | 1 | -5.569  | -2.874 | -8.288 | 1.00 | 0.00 | H |
| HETATM | 185 | C203 | UNK | 1 | -0.728  | 2.031  | -3.912 | 1.00 | 0.00 | C |
| HETATM | 186 | H204 | UNK | 1 | -1.133  | 1.068  | -3.580 | 1.00 | 0.00 | H |
| HETATM | 187 | H205 | UNK | 1 | -0.937  | 2.748  | -3.111 | 1.00 | 0.00 | H |
| HETATM | 188 | C206 | UNK | 1 | -1.408  | 2.470  | -5.219 | 1.00 | 0.00 | C |
| HETATM | 189 | H207 | UNK | 1 | -0.947  | 3.403  | -5.572 | 1.00 | 0.00 | H |
| HETATM | 190 | H208 | UNK | 1 | -1.209  | 1.723  | -6.000 | 1.00 | 0.00 | H |
| HETATM | 191 | C209 | UNK | 1 | -2.922  | 2.678  | -5.097 | 1.00 | 0.00 | C |
| HETATM | 192 | H210 | UNK | 1 | -3.393  | 1.756  | -4.732 | 1.00 | 0.00 | H |
| HETATM | 193 | H211 | UNK | 1 | -3.122  | 3.441  | -4.332 | 1.00 | 0.00 | H |
| HETATM | 194 | C212 | UNK | 1 | -3.583  | 3.101  | -6.415 | 1.00 | 0.00 | C |
| HETATM | 195 | H213 | UNK | 1 | -3.099  | 4.016  | -6.785 | 1.00 | 0.00 | H |
| HETATM | 196 | H214 | UNK | 1 | -3.395  | 2.332  | -7.176 | 1.00 | 0.00 | H |
| HETATM | 197 | C215 | UNK | 1 | -5.091  | 3.336  | -6.287 | 1.00 | 0.00 | C |
| HETATM | 198 | H216 | UNK | 1 | -5.608  | 2.432  | -5.948 | 1.00 | 0.00 | H |
| HETATM | 199 | H217 | UNK | 1 | -5.307  | 4.129  | -5.562 | 1.00 | 0.00 | H |
| HETATM | 200 | H218 | UNK | 1 | -5.529  | 3.635  | -7.244 | 1.00 | 0.00 | H |
| HETATM | 201 | C219 | UNK | 1 | -4.946  | -2.257 | 1.569  | 1.00 | 0.00 | C |
| HETATM | 202 | H220 | UNK | 1 | -4.467  | -2.693 | 0.684  | 1.00 | 0.00 | H |
| HETATM | 203 | H221 | UNK | 1 | -4.938  | -3.025 | 2.352  | 1.00 | 0.00 | H |
| HETATM | 204 | C222 | UNK | 1 | -6.400  | -1.889 | 1.221  | 1.00 | 0.00 | C |
| HETATM | 205 | H223 | UNK | 1 | -6.402  | -1.110 | 0.446  | 1.00 | 0.00 | H |
| HETATM | 206 | H224 | UNK | 1 | -6.874  | -2.766 | 0.764  | 1.00 | 0.00 | H |
| HETATM | 207 | C225 | UNK | 1 | -7.259  | -1.431 | 2.409  | 1.00 | 0.00 | C |
| HETATM | 208 | H226 | UNK | 1 | -7.214  | -2.190 | 3.203  | 1.00 | 0.00 | H |
| HETATM | 209 | H227 | UNK | 1 | -6.846  | -0.511 | 2.846  | 1.00 | 0.00 | H |
| HETATM | 210 | C228 | UNK | 1 | -8.725  | -1.183 | 2.030  | 1.00 | 0.00 | C |
| HETATM | 211 | H229 | UNK | 1 | -8.768  | -0.434 | 1.227  | 1.00 | 0.00 | H |
| HETATM | 212 | H230 | UNK | 1 | -9.147  | -2.104 | 1.605  | 1.00 | 0.00 | H |
| HETATM | 213 | C231 | UNK | 1 | -9.585  | -0.721 | 3.209  | 1.00 | 0.00 | C |
| HETATM | 214 | H232 | UNK | 1 | -9.589  | -1.465 | 4.013  | 1.00 | 0.00 | H |
| HETATM | 215 | H233 | UNK | 1 | -9.210  | 0.218  | 3.631  | 1.00 | 0.00 | H |
| HETATM | 216 | H234 | UNK | 1 | -10.624 | -0.556 | 2.905  | 1.00 | 0.00 | H |
| HETATM | 217 | C235 | UNK | 1 | -3.145  | -5.329 | -1.693 | 1.00 | 0.00 | C |
| HETATM | 218 | H236 | UNK | 1 | -3.821  | -4.557 | -1.303 | 1.00 | 0.00 | H |
| HETATM | 219 | H237 | UNK | 1 | -2.689  | -4.920 | -2.604 | 1.00 | 0.00 | H |
| HETATM | 220 | C238 | UNK | 1 | -3.943  | -6.594 | -2.035 | 1.00 | 0.00 | C |
| HETATM | 221 | H239 | UNK | 1 | -3.259  | -7.373 | -2.397 | 1.00 | 0.00 | H |
| HETATM | 222 | H240 | UNK | 1 | -4.404  | -6.994 | -1.121 | 1.00 | 0.00 | H |
| HETATM | 223 | C241 | UNK | 1 | -5.033  | -6.349 | -3.086 | 1.00 | 0.00 | C |
| HETATM | 224 | H242 | UNK | 1 | -5.714  | -5.564 | -2.727 | 1.00 | 0.00 | H |
| HETATM | 225 | H243 | UNK | 1 | -4.570  | -5.954 | -4.002 | 1.00 | 0.00 | H |
| HETATM | 226 | C244 | UNK | 1 | -5.845  | -7.603 | -3.431 | 1.00 | 0.00 | C |
| HETATM | 227 | H245 | UNK | 1 | -5.165  | -8.389 | -3.785 | 1.00 | 0.00 | H |
| HETATM | 228 | H246 | UNK | 1 | -6.311  | -7.994 | -2.517 | 1.00 | 0.00 | H |
| HETATM | 229 | C247 | UNK | 1 | -6.925  | -7.348 | -4.487 | 1.00 | 0.00 | C |
| HETATM | 230 | H248 | UNK | 1 | -7.642  | -6.592 | -4.147 | 1.00 | 0.00 | H |
| HETATM | 231 | H249 | UNK | 1 | -6.487  | -6.990 | -5.425 | 1.00 | 0.00 | H |
| HETATM | 232 | H250 | UNK | 1 | -7.487  | -8.260 | -4.710 | 1.00 | 0.00 | H |
| HETATM | 233 | C251 | UNK | 1 | -1.975  | 5.031  | -1.075 | 1.00 | 0.00 | C |
| HETATM | 234 | H252 | UNK | 1 | -2.055  | 4.312  | -1.899 | 1.00 | 0.00 | H |
| HETATM | 235 | H253 | UNK | 1 | -2.454  | 4.570  | -0.202 | 1.00 | 0.00 | H |
| HETATM | 236 | C254 | UNK | 1 | -2.709  | 6.328  | -1.446 | 1.00 | 0.00 | C |
| HETATM | 237 | H255 | UNK | 1 | -2.608  | 7.052  | -0.625 | 1.00 | 0.00 | H |
| HETATM | 238 | H256 | UNK | 1 | -2.224  | 6.788  | -2.318 | 1.00 | 0.00 | H |
| HETATM | 239 | C257 | UNK | 1 | -4.197  | 6.114  | -1.748 | 1.00 | 0.00 | C |
| HETATM | 240 | H258 | UNK | 1 | -4.302  | 5.395  | -2.574 | 1.00 | 0.00 | H |
| HETATM | 241 | H259 | UNK | 1 | -4.681  | 5.650  | -0.876 | 1.00 | 0.00 | H |

|        |     |      |     |   |        |        |        |      |      |   |
|--------|-----|------|-----|---|--------|--------|--------|------|------|---|
| HETATM | 242 | C260 | UNK | 1 | -4.941 | 7.407  | -2.109 | 1.00 | 0.00 | C |
| HETATM | 243 | H261 | UNK | 1 | -4.831 | 8.127  | -1.287 | 1.00 | 0.00 | H |
| HETATM | 244 | H262 | UNK | 1 | -4.460 | 7.868  | -2.982 | 1.00 | 0.00 | H |
| HETATM | 245 | C263 | UNK | 1 | -6.428 | 7.186  | -2.400 | 1.00 | 0.00 | C |
| HETATM | 246 | H264 | UNK | 1 | -6.570 | 6.495  | -3.239 | 1.00 | 0.00 | H |
| HETATM | 247 | H265 | UNK | 1 | -6.944 | 6.762  | -1.531 | 1.00 | 0.00 | H |
| HETATM | 248 | H266 | UNK | 1 | -6.927 | 8.125  | -2.656 | 1.00 | 0.00 | H |
| HETATM | 249 | C267 | UNK | 1 | -4.220 | 4.099  | 2.904  | 1.00 | 0.00 | C |
| HETATM | 250 | H268 | UNK | 1 | -3.921 | 4.522  | 1.936  | 1.00 | 0.00 | H |
| HETATM | 251 | H269 | UNK | 1 | -4.788 | 3.187  | 2.684  | 1.00 | 0.00 | H |
| HETATM | 252 | C270 | UNK | 1 | -5.104 | 5.100  | 3.659  | 1.00 | 0.00 | C |
| HETATM | 253 | H271 | UNK | 1 | -5.388 | 4.678  | 4.633  | 1.00 | 0.00 | H |
| HETATM | 254 | H272 | UNK | 1 | -4.526 | 6.009  | 3.879  | 1.00 | 0.00 | H |
| HETATM | 255 | C273 | UNK | 1 | -6.372 | 5.483  | 2.885  | 1.00 | 0.00 | C |
| HETATM | 256 | H274 | UNK | 1 | -6.088 | 5.899  | 1.907  | 1.00 | 0.00 | H |
| HETATM | 257 | H275 | UNK | 1 | -6.953 | 4.575  | 2.671  | 1.00 | 0.00 | H |
| HETATM | 258 | C276 | UNK | 1 | -7.261 | 6.491  | 3.623  | 1.00 | 0.00 | C |
| HETATM | 259 | H277 | UNK | 1 | -7.542 | 6.077  | 4.601  | 1.00 | 0.00 | H |
| HETATM | 260 | H278 | UNK | 1 | -6.681 | 7.399  | 3.833  | 1.00 | 0.00 | H |
| HETATM | 261 | C279 | UNK | 1 | -8.526 | 6.861  | 2.843  | 1.00 | 0.00 | C |
| HETATM | 262 | H280 | UNK | 1 | -8.278 | 7.309  | 1.873  | 1.00 | 0.00 | H |
| HETATM | 263 | H281 | UNK | 1 | -9.146 | 5.978  | 2.650  | 1.00 | 0.00 | H |
| HETATM | 264 | H282 | UNK | 1 | -9.138 | 7.582  | 3.393  | 1.00 | 0.00 | H |
| HETATM | 265 | N91  | UNK | 1 | 0.570  | -0.255 | -0.465 | 1.00 | 0.00 | N |
| HETATM | 266 | C92  | UNK | 1 | -0.798 | -0.134 | 0.202  | 1.00 | 0.00 | C |
| HETATM | 267 | C93  | UNK | 1 | -4.438 | 0.432  | -2.063 | 1.00 | 0.00 | C |
| HETATM | 268 | C94  | UNK | 1 | -3.857 | -0.843 | -1.937 | 1.00 | 0.00 | C |
| HETATM | 269 | C95  | UNK | 1 | -2.655 | -1.025 | -1.258 | 1.00 | 0.00 | C |
| HETATM | 270 | C96  | UNK | 1 | -1.986 | 0.070  | -0.694 | 1.00 | 0.00 | C |
| HETATM | 271 | C97  | UNK | 1 | -2.547 | 1.345  | -0.827 | 1.00 | 0.00 | C |
| HETATM | 272 | C98  | UNK | 1 | -3.751 | 1.524  | -1.503 | 1.00 | 0.00 | C |
| HETATM | 273 | H99  | UNK | 1 | -0.923 | -1.048 | 0.784  | 1.00 | 0.00 | H |
| HETATM | 274 | H100 | UNK | 1 | -0.702 | 0.697  | 0.903  | 1.00 | 0.00 | H |
| HETATM | 275 | H101 | UNK | 1 | 0.824  | 0.615  | -0.957 | 1.00 | 0.00 | H |
| HETATM | 276 | H102 | UNK | 1 | 0.557  | -0.977 | -1.207 | 1.00 | 0.00 | H |
| HETATM | 277 | H103 | UNK | 1 | -4.381 | -1.708 | -2.331 | 1.00 | 0.00 | H |
| HETATM | 278 | H104 | UNK | 1 | -2.262 | -2.029 | -1.117 | 1.00 | 0.00 | H |
| HETATM | 279 | H105 | UNK | 1 | -2.046 | 2.197  | -0.378 | 1.00 | 0.00 | H |
| HETATM | 280 | H106 | UNK | 1 | -4.164 | 2.522  | -1.601 | 1.00 | 0.00 | H |
| HETATM | 281 | H107 | UNK | 1 | 1.401  | -1.686 | 0.826  | 1.00 | 0.00 | H |
| HETATM | 282 | H108 | UNK | 1 | 1.238  | -0.066 | 1.510  | 1.00 | 0.00 | H |
| HETATM | 283 | C283 | UNK | 1 | -8.239 | 0.960  | -4.013 | 1.00 | 0.00 | C |
| HETATM | 284 | C284 | UNK | 1 | -7.907 | 1.729  | -2.896 | 1.00 | 0.00 | C |
| HETATM | 285 | C285 | UNK | 1 | -6.676 | 1.559  | -2.267 | 1.00 | 0.00 | C |
| HETATM | 286 | C286 | UNK | 1 | -5.748 | 0.615  | -2.739 | 1.00 | 0.00 | C |
| HETATM | 287 | C287 | UNK | 1 | -6.097 | -0.155 | -3.862 | 1.00 | 0.00 | C |
| HETATM | 288 | C288 | UNK | 1 | -7.328 | 0.016  | -4.492 | 1.00 | 0.00 | C |
| HETATM | 289 | H289 | UNK | 1 | -9.198 | 1.092  | -4.503 | 1.00 | 0.00 | H |
| HETATM | 290 | H290 | UNK | 1 | -8.613 | 2.458  | -2.509 | 1.00 | 0.00 | H |
| HETATM | 291 | H291 | UNK | 1 | -6.441 | 2.146  | -1.384 | 1.00 | 0.00 | H |
| HETATM | 292 | H292 | UNK | 1 | -5.390 | -0.877 | -4.259 | 1.00 | 0.00 | H |
| HETATM | 293 | H293 | UNK | 1 | -7.574 | -0.585 | -5.363 | 1.00 | 0.00 | H |
| HETATM | 294 | C294 | UNK | 1 | 1.574  | -0.626 | 0.634  | 1.00 | 0.00 | C |
| HETATM | 295 | C295 | UNK | 1 | 5.827  | 0.117  | 0.405  | 1.00 | 0.00 | C |
| HETATM | 296 | C296 | UNK | 1 | 4.913  | 1.183  | 0.474  | 1.00 | 0.00 | C |
| HETATM | 297 | C297 | UNK | 1 | 3.541  | 0.955  | 0.487  | 1.00 | 0.00 | C |
| HETATM | 298 | C298 | UNK | 1 | 3.033  | -0.348 | 0.396  | 1.00 | 0.00 | C |
| HETATM | 299 | C299 | UNK | 1 | 3.935  | -1.411 | 0.286  | 1.00 | 0.00 | C |
| HETATM | 300 | C300 | UNK | 1 | 5.308  | -1.182 | 0.299  | 1.00 | 0.00 | C |
| HETATM | 301 | H301 | UNK | 1 | 5.274  | 2.203  | 0.522  | 1.00 | 0.00 | H |
| HETATM | 302 | H302 | UNK | 1 | 2.868  | 1.801  | 0.588  | 1.00 | 0.00 | H |
| HETATM | 303 | H303 | UNK | 1 | 3.564  | -2.428 | 0.230  | 1.00 | 0.00 | H |



|         |     |      |     |     |        |        |        |      |      |   |
|---------|-----|------|-----|-----|--------|--------|--------|------|------|---|
| HETATM  | 304 | H304 | UNK | 1   | 5.984  | -2.029 | 0.271  | 1.00 | 0.00 | H |
| HETATM  | 305 | C305 | UNK | 1   | 10.076 | 0.787  | 0.597  | 1.00 | 0.00 | C |
| HETATM  | 306 | C306 | UNK | 1   | 9.561  | -0.235 | -0.201 | 1.00 | 0.00 | C |
| HETATM  | 307 | C307 | UNK | 1   | 8.186  | -0.451 | -0.264 | 1.00 | 0.00 | C |
| HETATM  | 308 | C308 | UNK | 1   | 7.292  | 0.351  | 0.467  | 1.00 | 0.00 | C |
| HETATM  | 309 | C309 | UNK | 1   | 7.827  | 1.373  | 1.270  | 1.00 | 0.00 | C |
| HETATM  | 310 | C310 | UNK | 1   | 9.203  | 1.589  | 1.333  | 1.00 | 0.00 | C |
| HETATM  | 311 | H311 | UNK | 1   | 11.148 | 0.955  | 0.648  | 1.00 | 0.00 | H |
| HETATM  | 312 | H312 | UNK | 1   | 10.231 | -0.863 | -0.781 | 1.00 | 0.00 | H |
| HETATM  | 313 | H313 | UNK | 1   | 7.797  | -1.237 | -0.903 | 1.00 | 0.00 | H |
| HETATM  | 314 | H314 | UNK | 1   | 7.163  | 1.983  | 1.873  | 1.00 | 0.00 | H |
| HETATM  | 315 | H315 | UNK | 1   | 9.594  | 2.379  | 1.968  | 1.00 | 0.00 | H |
| CONNECT | 1   | 36   | 80  |     |        |        |        |      |      |   |
| CONNECT | 2   | 8    | 78  |     |        |        |        |      |      |   |
| CONNECT | 3   | 16   | 82  |     |        |        |        |      |      |   |
| CONNECT | 4   | 6    | 79  |     |        |        |        |      |      |   |
| CONNECT | 5   | 13   | 49  |     |        |        |        |      |      |   |
| CONNECT | 6   | 4    | 11  | 32  |        |        |        |      |      |   |
| CONNECT | 7   | 9    | 10  | 130 |        |        |        |      |      |   |
| CONNECT | 8   | 2    | 23  | 28  |        |        |        |      |      |   |
| CONNECT | 9   | 7    | 23  | 50  |        |        |        |      |      |   |
| CONNECT | 10  | 7    | 28  | 51  |        |        |        |      |      |   |
| CONNECT | 11  | 6    | 15  | 17  |        |        |        |      |      |   |
| CONNECT | 12  | 19   | 32  | 52  | 53     |        |        |      |      |   |
| CONNECT | 13  | 5    | 33  | 35  |        |        |        |      |      |   |
| CONNECT | 14  | 16   | 26  | 37  |        |        |        |      |      |   |
| CONNECT | 15  | 11   | 23  | 54  | 55     |        |        |      |      |   |
| CONNECT | 16  | 3    | 14  | 19  |        |        |        |      |      |   |
| CONNECT | 17  | 11   | 38  | 74  |        |        |        |      |      |   |
| CONNECT | 18  | 21   | 30  | 57  |        |        |        |      |      |   |
| CONNECT | 19  | 12   | 16  | 27  |        |        |        |      |      |   |
| CONNECT | 20  | 24   | 36  | 40  |        |        |        |      |      |   |
| CONNECT | 21  | 18   | 40  | 143 |        |        |        |      |      |   |
| CONNECT | 22  | 33   | 45  | 67  | 68     |        |        |      |      |   |
| CONNECT | 23  | 8    | 9   | 15  |        |        |        |      |      |   |
| CONNECT | 24  | 20   | 28  | 58  | 59     |        |        |      |      |   |
| CONNECT | 25  | 27   | 37  | 117 |        |        |        |      |      |   |
| CONNECT | 26  | 14   | 35  | 69  | 70     |        |        |      |      |   |
| CONNECT | 27  | 19   | 25  | 61  |        |        |        |      |      |   |
| CONNECT | 28  | 8    | 10  | 24  |        |        |        |      |      |   |
| CONNECT | 29  | 34   | 35  | 62  |        |        |        |      |      |   |
| CONNECT | 30  | 18   | 36  | 41  |        |        |        |      |      |   |
| CONNECT | 31  | 33   | 34  | 72  |        |        |        |      |      |   |
| CONNECT | 32  | 6    | 12  | 39  |        |        |        |      |      |   |
| CONNECT | 33  | 13   | 22  | 31  |        |        |        |      |      |   |
| CONNECT | 34  | 29   | 31  | 91  |        |        |        |      |      |   |
| CONNECT | 35  | 13   | 26  | 29  |        |        |        |      |      |   |
| CONNECT | 36  | 1    | 20  | 30  |        |        |        |      |      |   |
| CONNECT | 37  | 14   | 25  | 63  |        |        |        |      |      |   |
| CONNECT | 38  | 17   | 39  | 104 |        |        |        |      |      |   |
| CONNECT | 39  | 32   | 38  | 64  |        |        |        |      |      |   |
| CONNECT | 40  | 20   | 21  | 73  |        |        |        |      |      |   |
| CONNECT | 41  | 30   | 47  | 65  | 66     |        |        |      |      |   |
| CONNECT | 42  | 43   | 47  | 75  |        |        |        |      |      |   |
| CONNECT | 43  | 42   | 44  | 156 |        |        |        |      |      |   |
| CONNECT | 44  | 43   | 45  | 71  |        |        |        |      |      |   |
| CONNECT | 45  | 22   | 44  | 46  |        |        |        |      |      |   |
| CONNECT | 46  | 45   | 47  | 48  |        |        |        |      |      |   |
| CONNECT | 47  | 41   | 42  | 46  |        |        |        |      |      |   |
| CONNECT | 48  | 46   | 81  |     |        |        |        |      |      |   |
| CONNECT | 49  | 5    | 76  | 77  | 169    |        |        |      |      |   |
| CONNECT | 50  | 9    |     |     |        |        |        |      |      |   |

|         |     |     |     |     |     |
|---------|-----|-----|-----|-----|-----|
| CONNECT | 51  | 10  |     |     |     |
| CONNECT | 52  | 12  |     |     |     |
| CONNECT | 53  | 12  |     |     |     |
| CONNECT | 54  | 15  |     |     |     |
| CONNECT | 55  | 15  |     |     |     |
| CONNECT | 56  | 79  |     |     |     |
| CONNECT | 57  | 18  |     |     |     |
| CONNECT | 58  | 24  |     |     |     |
| CONNECT | 59  | 24  |     |     |     |
| CONNECT | 60  | 82  |     |     |     |
| CONNECT | 61  | 27  |     |     |     |
| CONNECT | 62  | 29  |     |     |     |
| CONNECT | 63  | 37  |     |     |     |
| CONNECT | 64  | 39  |     |     |     |
| CONNECT | 65  | 41  |     |     |     |
| CONNECT | 66  | 41  |     |     |     |
| CONNECT | 67  | 22  |     |     |     |
| CONNECT | 68  | 22  |     |     |     |
| CONNECT | 69  | 26  |     |     |     |
| CONNECT | 70  | 26  |     |     |     |
| CONNECT | 71  | 44  |     |     |     |
| CONNECT | 72  | 31  |     |     |     |
| CONNECT | 73  | 40  |     |     |     |
| CONNECT | 74  | 17  |     |     |     |
| CONNECT | 75  | 42  |     |     |     |
| CONNECT | 76  | 49  |     |     |     |
| CONNECT | 77  | 49  |     |     |     |
| CONNECT | 78  | 2   | 84  | 90  | 249 |
| CONNECT | 79  | 4   | 56  | 85  | 201 |
| CONNECT | 80  | 1   | 83  | 86  | 233 |
| CONNECT | 81  | 48  | 87  | 88  | 185 |
| CONNECT | 82  | 3   | 60  | 89  | 217 |
| CONNECT | 83  | 80  |     |     |     |
| CONNECT | 84  | 78  |     |     |     |
| CONNECT | 85  | 79  |     |     |     |
| CONNECT | 86  | 80  |     |     |     |
| CONNECT | 87  | 81  |     |     |     |
| CONNECT | 88  | 81  |     |     |     |
| CONNECT | 89  | 82  |     |     |     |
| CONNECT | 90  | 78  |     |     |     |
| CONNECT | 91  | 34  | 92  | 96  | 100 |
| CONNECT | 92  | 91  | 93  | 94  | 95  |
| CONNECT | 93  | 92  |     |     |     |
| CONNECT | 94  | 92  |     |     |     |
| CONNECT | 95  | 92  |     |     |     |
| CONNECT | 96  | 91  | 97  | 98  | 99  |
| CONNECT | 97  | 96  |     |     |     |
| CONNECT | 98  | 96  |     |     |     |
| CONNECT | 99  | 96  |     |     |     |
| CONNECT | 100 | 91  | 101 | 102 | 103 |
| CONNECT | 101 | 100 |     |     |     |
| CONNECT | 102 | 100 |     |     |     |
| CONNECT | 103 | 100 |     |     |     |
| CONNECT | 104 | 38  | 105 | 109 | 113 |
| CONNECT | 105 | 104 | 106 | 107 | 108 |
| CONNECT | 106 | 105 |     |     |     |
| CONNECT | 107 | 105 |     |     |     |
| CONNECT | 108 | 105 |     |     |     |
| CONNECT | 109 | 104 | 110 | 111 | 112 |
| CONNECT | 110 | 109 |     |     |     |
| CONNECT | 111 | 109 |     |     |     |
| CONNECT | 112 | 109 |     |     |     |

|         |     |     |     |     |     |
|---------|-----|-----|-----|-----|-----|
| CONNECT | 113 | 104 | 114 | 115 | 116 |
| CONNECT | 114 | 113 |     |     |     |
| CONNECT | 115 | 113 |     |     |     |
| CONNECT | 116 | 113 |     |     |     |
| CONNECT | 117 | 25  | 118 | 122 | 126 |
| CONNECT | 118 | 117 | 119 | 120 | 121 |
| CONNECT | 119 | 118 |     |     |     |
| CONNECT | 120 | 118 |     |     |     |
| CONNECT | 121 | 118 |     |     |     |
| CONNECT | 122 | 117 | 123 | 124 | 125 |
| CONNECT | 123 | 122 |     |     |     |
| CONNECT | 124 | 122 |     |     |     |
| CONNECT | 125 | 122 |     |     |     |
| CONNECT | 126 | 117 | 127 | 128 | 129 |
| CONNECT | 127 | 126 |     |     |     |
| CONNECT | 128 | 126 |     |     |     |
| CONNECT | 129 | 126 |     |     |     |
| CONNECT | 130 | 7   | 131 | 135 | 139 |
| CONNECT | 131 | 130 | 132 | 133 | 134 |
| CONNECT | 132 | 131 |     |     |     |
| CONNECT | 133 | 131 |     |     |     |
| CONNECT | 134 | 131 |     |     |     |
| CONNECT | 135 | 130 | 136 | 137 | 138 |
| CONNECT | 136 | 135 |     |     |     |
| CONNECT | 137 | 135 |     |     |     |
| CONNECT | 138 | 135 |     |     |     |
| CONNECT | 139 | 130 | 140 | 141 | 142 |
| CONNECT | 140 | 139 |     |     |     |
| CONNECT | 141 | 139 |     |     |     |
| CONNECT | 142 | 139 |     |     |     |
| CONNECT | 143 | 21  | 144 | 148 | 152 |
| CONNECT | 144 | 143 | 145 | 146 | 147 |
| CONNECT | 145 | 144 |     |     |     |
| CONNECT | 146 | 144 |     |     |     |
| CONNECT | 147 | 144 |     |     |     |
| CONNECT | 148 | 143 | 149 | 150 | 151 |
| CONNECT | 149 | 148 |     |     |     |
| CONNECT | 150 | 148 |     |     |     |
| CONNECT | 151 | 148 |     |     |     |
| CONNECT | 152 | 143 | 153 | 154 | 155 |
| CONNECT | 153 | 152 |     |     |     |
| CONNECT | 154 | 152 |     |     |     |
| CONNECT | 155 | 152 |     |     |     |
| CONNECT | 156 | 43  | 157 | 161 | 165 |
| CONNECT | 157 | 156 | 158 | 159 | 160 |
| CONNECT | 158 | 157 |     |     |     |
| CONNECT | 159 | 157 |     |     |     |
| CONNECT | 160 | 157 |     |     |     |
| CONNECT | 161 | 156 | 162 | 163 | 164 |
| CONNECT | 162 | 161 |     |     |     |
| CONNECT | 163 | 161 |     |     |     |
| CONNECT | 164 | 161 |     |     |     |
| CONNECT | 165 | 156 | 166 | 167 | 168 |
| CONNECT | 166 | 165 |     |     |     |
| CONNECT | 167 | 165 |     |     |     |
| CONNECT | 168 | 165 |     |     |     |
| CONNECT | 169 | 49  | 170 | 171 | 172 |
| CONNECT | 170 | 169 |     |     |     |
| CONNECT | 171 | 169 |     |     |     |
| CONNECT | 172 | 169 | 173 | 174 | 175 |
| CONNECT | 173 | 172 |     |     |     |
| CONNECT | 174 | 172 |     |     |     |

|         |     |     |     |     |     |
|---------|-----|-----|-----|-----|-----|
| CONNECT | 175 | 172 | 176 | 177 | 178 |
| CONNECT | 176 | 175 |     |     |     |
| CONNECT | 177 | 175 |     |     |     |
| CONNECT | 178 | 175 | 179 | 180 | 181 |
| CONNECT | 179 | 178 |     |     |     |
| CONNECT | 180 | 178 |     |     |     |
| CONNECT | 181 | 178 | 182 | 183 | 184 |
| CONNECT | 182 | 181 |     |     |     |
| CONNECT | 183 | 181 |     |     |     |
| CONNECT | 184 | 181 |     |     |     |
| CONNECT | 185 | 81  | 186 | 187 | 188 |
| CONNECT | 186 | 185 |     |     |     |
| CONNECT | 187 | 185 |     |     |     |
| CONNECT | 188 | 185 | 189 | 190 | 191 |
| CONNECT | 189 | 188 |     |     |     |
| CONNECT | 190 | 188 |     |     |     |
| CONNECT | 191 | 188 | 192 | 193 | 194 |
| CONNECT | 192 | 191 |     |     |     |
| CONNECT | 193 | 191 |     |     |     |
| CONNECT | 194 | 191 | 195 | 196 | 197 |
| CONNECT | 195 | 194 |     |     |     |
| CONNECT | 196 | 194 |     |     |     |
| CONNECT | 197 | 194 | 198 | 199 | 200 |
| CONNECT | 198 | 197 |     |     |     |
| CONNECT | 199 | 197 |     |     |     |
| CONNECT | 200 | 197 |     |     |     |
| CONNECT | 201 | 79  | 202 | 203 | 204 |
| CONNECT | 202 | 201 |     |     |     |
| CONNECT | 203 | 201 |     |     |     |
| CONNECT | 204 | 201 | 205 | 206 | 207 |
| CONNECT | 205 | 204 |     |     |     |
| CONNECT | 206 | 204 |     |     |     |
| CONNECT | 207 | 204 | 208 | 209 | 210 |
| CONNECT | 208 | 207 |     |     |     |
| CONNECT | 209 | 207 |     |     |     |
| CONNECT | 210 | 207 | 211 | 212 | 213 |
| CONNECT | 211 | 210 |     |     |     |
| CONNECT | 212 | 210 |     |     |     |
| CONNECT | 213 | 210 | 214 | 215 | 216 |
| CONNECT | 214 | 213 |     |     |     |
| CONNECT | 215 | 213 |     |     |     |
| CONNECT | 216 | 213 |     |     |     |
| CONNECT | 217 | 82  | 218 | 219 | 220 |
| CONNECT | 218 | 217 |     |     |     |
| CONNECT | 219 | 217 |     |     |     |
| CONNECT | 220 | 217 | 221 | 222 | 223 |
| CONNECT | 221 | 220 |     |     |     |
| CONNECT | 222 | 220 |     |     |     |
| CONNECT | 223 | 220 | 224 | 225 | 226 |
| CONNECT | 224 | 223 |     |     |     |
| CONNECT | 225 | 223 |     |     |     |
| CONNECT | 226 | 223 | 227 | 228 | 229 |
| CONNECT | 227 | 226 |     |     |     |
| CONNECT | 228 | 226 |     |     |     |
| CONNECT | 229 | 226 | 230 | 231 | 232 |
| CONNECT | 230 | 229 |     |     |     |
| CONNECT | 231 | 229 |     |     |     |
| CONNECT | 232 | 229 |     |     |     |
| CONNECT | 233 | 80  | 234 | 235 | 236 |
| CONNECT | 234 | 233 |     |     |     |
| CONNECT | 235 | 233 |     |     |     |
| CONNECT | 236 | 233 | 237 | 238 | 239 |

|         |     |     |     |     |     |
|---------|-----|-----|-----|-----|-----|
| CONNECT | 237 | 236 |     |     |     |
| CONNECT | 238 | 236 |     |     |     |
| CONNECT | 239 | 236 | 240 | 241 | 242 |
| CONNECT | 240 | 239 |     |     |     |
| CONNECT | 241 | 239 |     |     |     |
| CONNECT | 242 | 239 | 243 | 244 | 245 |
| CONNECT | 243 | 242 |     |     |     |
| CONNECT | 244 | 242 |     |     |     |
| CONNECT | 245 | 242 | 246 | 247 | 248 |
| CONNECT | 246 | 245 |     |     |     |
| CONNECT | 247 | 245 |     |     |     |
| CONNECT | 248 | 245 |     |     |     |
| CONNECT | 249 | 78  | 250 | 251 | 252 |
| CONNECT | 250 | 249 |     |     |     |
| CONNECT | 251 | 249 |     |     |     |
| CONNECT | 252 | 249 | 253 | 254 | 255 |
| CONNECT | 253 | 252 |     |     |     |
| CONNECT | 254 | 252 |     |     |     |
| CONNECT | 255 | 252 | 256 | 257 | 258 |
| CONNECT | 256 | 255 |     |     |     |
| CONNECT | 257 | 255 |     |     |     |
| CONNECT | 258 | 255 | 259 | 260 | 261 |
| CONNECT | 259 | 258 |     |     |     |
| CONNECT | 260 | 258 |     |     |     |
| CONNECT | 261 | 258 | 262 | 263 | 264 |
| CONNECT | 262 | 261 |     |     |     |
| CONNECT | 263 | 261 |     |     |     |
| CONNECT | 264 | 261 |     |     |     |
| CONNECT | 265 | 266 | 275 | 276 | 294 |
| CONNECT | 266 | 265 | 270 | 273 | 274 |
| CONNECT | 267 | 268 | 272 | 286 |     |
| CONNECT | 268 | 267 | 269 | 277 |     |
| CONNECT | 269 | 268 | 270 | 278 |     |
| CONNECT | 270 | 266 | 269 | 271 |     |
| CONNECT | 271 | 270 | 272 | 279 |     |
| CONNECT | 272 | 267 | 271 | 280 |     |
| CONNECT | 273 | 266 |     |     |     |
| CONNECT | 274 | 266 |     |     |     |
| CONNECT | 275 | 265 |     |     |     |
| CONNECT | 276 | 265 |     |     |     |
| CONNECT | 277 | 268 |     |     |     |
| CONNECT | 278 | 269 |     |     |     |
| CONNECT | 279 | 271 |     |     |     |
| CONNECT | 280 | 272 |     |     |     |
| CONNECT | 281 | 294 |     |     |     |
| CONNECT | 282 | 294 |     |     |     |
| CONNECT | 283 | 284 | 288 | 289 |     |
| CONNECT | 284 | 283 | 285 | 290 |     |
| CONNECT | 285 | 284 | 286 | 291 |     |
| CONNECT | 286 | 267 | 285 | 287 |     |
| CONNECT | 287 | 286 | 288 | 292 |     |
| CONNECT | 288 | 283 | 287 | 293 |     |
| CONNECT | 289 | 283 |     |     |     |
| CONNECT | 290 | 284 |     |     |     |
| CONNECT | 291 | 285 |     |     |     |
| CONNECT | 292 | 287 |     |     |     |
| CONNECT | 293 | 288 |     |     |     |
| CONNECT | 294 | 265 | 281 | 282 | 298 |
| CONNECT | 295 | 296 | 300 | 308 |     |
| CONNECT | 296 | 295 | 297 | 301 |     |
| CONNECT | 297 | 296 | 298 | 302 |     |
| CONNECT | 298 | 294 | 297 | 299 |     |

```

CONNECT 299 298 300 303
CONNECT 300 295 299 304
CONNECT 301 296
CONNECT 302 297
CONNECT 303 299
CONNECT 304 300
CONNECT 305 306 310 311
CONNECT 306 305 307 312
CONNECT 307 306 308 313
CONNECT 308 295 307 309
CONNECT 309 308 310 314
CONNECT 310 305 309 315
CONNECT 311 305
CONNECT 312 306
CONNECT 313 307
CONNECT 314 309
CONNECT 315 310
MASTER      0      0      0      0      0      0      0      0      3 315      0 315      0
END

```

## Atomic coordinates of $2^+ \subset 1^{1,2,3-alt}$

|        |    |     |     |   |        |        |        |      |      |   |
|--------|----|-----|-----|---|--------|--------|--------|------|------|---|
| HETATM | 1  | O1  | UNK | 1 | 2.652  | -1.985 | -3.479 | 1.00 | 0.00 | O |
| HETATM | 2  | O2  | UNK | 1 | -0.813 | -4.930 | -0.850 | 1.00 | 0.00 | O |
| HETATM | 3  | O3  | UNK | 1 | -2.769 | 0.633  | 2.449  | 1.00 | 0.00 | O |
| HETATM | 4  | O4  | UNK | 1 | -1.916 | -2.720 | 2.278  | 1.00 | 0.00 | O |
| HETATM | 5  | O5  | UNK | 1 | 0.583  | 2.781  | 0.627  | 1.00 | 0.00 | O |
| HETATM | 6  | C6  | UNK | 1 | -1.080 | -3.042 | 3.343  | 1.00 | 0.00 | C |
| HETATM | 7  | C7  | UNK | 1 | 3.196  | -4.468 | 0.355  | 1.00 | 0.00 | C |
| HETATM | 8  | C8  | UNK | 1 | 0.497  | -4.706 | -0.433 | 1.00 | 0.00 | C |
| HETATM | 9  | C9  | UNK | 1 | 2.174  | -4.635 | 1.295  | 1.00 | 0.00 | C |
| HETATM | 10 | C10 | UNK | 1 | 2.812  | -4.340 | -0.987 | 1.00 | 0.00 | C |
| HETATM | 11 | C11 | UNK | 1 | -0.237 | -4.166 | 3.230  | 1.00 | 0.00 | C |
| HETATM | 12 | C12 | UNK | 1 | -2.019 | -1.050 | 4.650  | 1.00 | 0.00 | C |
| HETATM | 13 | C13 | UNK | 1 | -0.035 | 4.024  | 0.494  | 1.00 | 0.00 | C |
| HETATM | 14 | C14 | UNK | 1 | -1.447 | 2.501  | 3.243  | 1.00 | 0.00 | C |
| HETATM | 15 | C15 | UNK | 1 | -0.243 | -5.049 | 1.988  | 1.00 | 0.00 | C |
| HETATM | 16 | C16 | UNK | 1 | -1.887 | 1.171  | 3.389  | 1.00 | 0.00 | C |
| HETATM | 17 | C17 | UNK | 1 | 0.590  | -4.476 | 4.312  | 1.00 | 0.00 | C |
| HETATM | 18 | C18 | UNK | 1 | -0.684 | -0.857 | -4.570 | 1.00 | 0.00 | C |
| HETATM | 19 | C19 | UNK | 1 | -1.465 | 0.364  | 4.461  | 1.00 | 0.00 | C |
| HETATM | 20 | C20 | UNK | 1 | 0.523  | -3.112 | -3.436 | 1.00 | 0.00 | C |
| HETATM | 21 | C21 | UNK | 1 | -1.465 | -1.997 | -4.353 | 1.00 | 0.00 | C |
| HETATM | 22 | C22 | UNK | 1 | 1.466  | 4.485  | -1.528 | 1.00 | 0.00 | C |
| HETATM | 23 | C23 | UNK | 1 | 0.827  | -4.759 | 0.933  | 1.00 | 0.00 | C |
| HETATM | 24 | C24 | UNK | 1 | 1.156  | -4.390 | -2.893 | 1.00 | 0.00 | C |
| HETATM | 25 | C25 | UNK | 1 | -0.206 | 2.287  | 5.344  | 1.00 | 0.00 | C |
| HETATM | 26 | C26 | UNK | 1 | -1.961 | 3.326  | 2.071  | 1.00 | 0.00 | C |
| HETATM | 27 | C27 | UNK | 1 | -0.619 | 0.947  | 5.410  | 1.00 | 0.00 | C |
| HETATM | 28 | C28 | UNK | 1 | 1.483  | -4.449 | -1.404 | 1.00 | 0.00 | C |
| HETATM | 29 | C29 | UNK | 1 | -1.641 | 5.664  | 1.219  | 1.00 | 0.00 | C |
| HETATM | 30 | C30 | UNK | 1 | 0.686  | -0.810 | -4.269 | 1.00 | 0.00 | C |
| HETATM | 31 | C31 | UNK | 1 | -0.146 | 6.182  | -0.566 | 1.00 | 0.00 | C |
| HETATM | 32 | C32 | UNK | 1 | -1.068 | -2.233 | 4.491  | 1.00 | 0.00 | C |
| HETATM | 33 | C33 | UNK | 1 | 0.414  | 4.902  | -0.509 | 1.00 | 0.00 | C |

|        |    |      |     |   |        |        |        |      |      |   |
|--------|----|------|-----|---|--------|--------|--------|------|------|---|
| HETATM | 34 | C34  | UNK | 1 | -1.151 | 6.610  | 0.313  | 1.00 | 0.00 | C |
| HETATM | 35 | C35  | UNK | 1 | -1.127 | 4.361  | 1.316  | 1.00 | 0.00 | C |
| HETATM | 36 | C36  | UNK | 1 | 1.287  | -1.963 | -3.729 | 1.00 | 0.00 | C |
| HETATM | 37 | C37  | UNK | 1 | -0.637 | 3.042  | 4.247  | 1.00 | 0.00 | C |
| HETATM | 38 | C38  | UNK | 1 | 0.637  | -3.700 | 5.482  | 1.00 | 0.00 | C |
| HETATM | 39 | C39  | UNK | 1 | -0.201 | -2.584 | 5.538  | 1.00 | 0.00 | C |
| HETATM | 40 | C40  | UNK | 1 | -0.838 | -3.098 | -3.752 | 1.00 | 0.00 | C |
| HETATM | 41 | C41  | UNK | 1 | 1.536  | 0.418  | -4.613 | 1.00 | 0.00 | C |
| HETATM | 42 | C42  | UNK | 1 | -0.031 | 2.386  | -4.993 | 1.00 | 0.00 | C |
| HETATM | 43 | C43  | UNK | 1 | -0.578 | 3.640  | -4.675 | 1.00 | 0.00 | C |
| HETATM | 44 | C44  | UNK | 1 | -0.102 | 4.267  | -3.520 | 1.00 | 0.00 | C |
| HETATM | 45 | C45  | UNK | 1 | 0.925  | 3.723  | -2.736 | 1.00 | 0.00 | C |
| HETATM | 46 | C46  | UNK | 1 | 1.480  | 2.490  | -3.123 | 1.00 | 0.00 | C |
| HETATM | 47 | C47  | UNK | 1 | 0.969  | 1.778  | -4.228 | 1.00 | 0.00 | C |
| HETATM | 48 | O48  | UNK | 1 | 2.576  | 1.981  | -2.436 | 1.00 | 0.00 | O |
| HETATM | 49 | C49  | UNK | 1 | 1.560  | 2.699  | 1.718  | 1.00 | 0.00 | C |
| HETATM | 50 | H50  | UNK | 1 | 2.422  | -4.694 | 2.348  | 1.00 | 0.00 | H |
| HETATM | 51 | H51  | UNK | 1 | 3.563  | -4.179 | -1.752 | 1.00 | 0.00 | H |
| HETATM | 52 | H52  | UNK | 1 | -2.437 | -1.102 | 5.663  | 1.00 | 0.00 | H |
| HETATM | 53 | H53  | UNK | 1 | -2.844 | -1.176 | 3.955  | 1.00 | 0.00 | H |
| HETATM | 54 | H54  | UNK | 1 | -1.214 | -4.991 | 1.498  | 1.00 | 0.00 | H |
| HETATM | 55 | H55  | UNK | 1 | -0.121 | -6.088 | 2.322  | 1.00 | 0.00 | H |
| HETATM | 56 | H56  | UNK | 1 | -3.825 | -2.961 | 3.078  | 1.00 | 0.00 | H |
| HETATM | 57 | H57  | UNK | 1 | -1.137 | 0.023  | -5.006 | 1.00 | 0.00 | H |
| HETATM | 58 | H58  | UNK | 1 | 0.481  | -5.213 | -3.142 | 1.00 | 0.00 | H |
| HETATM | 59 | H59  | UNK | 1 | 2.085  | -4.581 | -3.436 | 1.00 | 0.00 | H |
| HETATM | 60 | H60  | UNK | 1 | -4.350 | 1.663  | 1.590  | 1.00 | 0.00 | H |
| HETATM | 61 | H61  | UNK | 1 | -0.308 | 0.341  | 6.255  | 1.00 | 0.00 | H |
| HETATM | 62 | H62  | UNK | 1 | -2.471 | 5.921  | 1.867  | 1.00 | 0.00 | H |
| HETATM | 63 | H63  | UNK | 1 | -0.349 | 4.083  | 4.154  | 1.00 | 0.00 | H |
| HETATM | 64 | H64  | UNK | 1 | -0.222 | -1.974 | 6.434  | 1.00 | 0.00 | H |
| HETATM | 65 | H65  | UNK | 1 | 1.709  | 0.417  | -5.698 | 1.00 | 0.00 | H |
| HETATM | 66 | H66  | UNK | 1 | 2.505  | 0.291  | -4.134 | 1.00 | 0.00 | H |
| HETATM | 67 | H67  | UNK | 1 | 2.221  | 3.864  | -1.053 | 1.00 | 0.00 | H |
| HETATM | 68 | H68  | UNK | 1 | 1.970  | 5.392  | -1.884 | 1.00 | 0.00 | H |
| HETATM | 69 | H69  | UNK | 1 | -2.316 | 2.626  | 1.311  | 1.00 | 0.00 | H |
| HETATM | 70 | H70  | UNK | 1 | -2.862 | 3.852  | 2.409  | 1.00 | 0.00 | H |
| HETATM | 71 | H71  | UNK | 1 | -0.512 | 5.223  | -3.217 | 1.00 | 0.00 | H |
| HETATM | 72 | H72  | UNK | 1 | 0.236  | 6.868  | -1.318 | 1.00 | 0.00 | H |
| HETATM | 73 | H73  | UNK | 1 | -1.407 | -3.998 | -3.549 | 1.00 | 0.00 | H |
| HETATM | 74 | H74  | UNK | 1 | 1.204  | -5.369 | 4.242  | 1.00 | 0.00 | H |
| HETATM | 75 | H75  | UNK | 1 | -0.371 | 1.875  | -5.889 | 1.00 | 0.00 | H |
| HETATM | 76 | H76  | UNK | 1 | 1.600  | 1.638  | 1.952  | 1.00 | 0.00 | H |
| HETATM | 77 | H77  | UNK | 1 | 1.148  | 3.219  | 2.583  | 1.00 | 0.00 | H |
| HETATM | 78 | C78  | UNK | 1 | -1.123 | -6.330 | -1.011 | 1.00 | 0.00 | C |
| HETATM | 79 | C79  | UNK | 1 | -3.190 | -3.397 | 2.294  | 1.00 | 0.00 | C |
| HETATM | 80 | C80  | UNK | 1 | 3.455  | -2.316 | -4.630 | 1.00 | 0.00 | C |
| HETATM | 81 | C81  | UNK | 1 | 3.831  | 2.449  | -2.977 | 1.00 | 0.00 | C |
| HETATM | 82 | C82  | UNK | 1 | -4.135 | 1.143  | 2.528  | 1.00 | 0.00 | C |
| HETATM | 83 | H83  | UNK | 1 | 3.230  | -1.624 | -5.453 | 1.00 | 0.00 | H |
| HETATM | 84 | H84  | UNK | 1 | -0.390 | -6.792 | -1.687 | 1.00 | 0.00 | H |
| HETATM | 85 | H85  | UNK | 1 | -3.042 | -4.454 | 2.546  | 1.00 | 0.00 | H |
| HETATM | 86 | H86  | UNK | 1 | 3.201  | -3.327 | -4.978 | 1.00 | 0.00 | H |
| HETATM | 87 | H87  | UNK | 1 | 3.877  | 2.209  | -4.049 | 1.00 | 0.00 | H |
| HETATM | 88 | H88  | UNK | 1 | 3.883  | 3.543  | -2.885 | 1.00 | 0.00 | H |
| HETATM | 89 | H89  | UNK | 1 | -4.184 | 1.871  | 3.343  | 1.00 | 0.00 | H |
| HETATM | 90 | H90  | UNK | 1 | -1.036 | -6.841 | -0.042 | 1.00 | 0.00 | H |
| HETATM | 91 | C109 | UNK | 1 | -1.688 | 8.051  | 0.234  | 1.00 | 0.00 | C |
| HETATM | 92 | C110 | UNK | 1 | -2.772 | 8.331  | 1.291  | 1.00 | 0.00 | C |
| HETATM | 93 | H111 | UNK | 1 | -3.652 | 7.693  | 1.155  | 1.00 | 0.00 | H |
| HETATM | 94 | H112 | UNK | 1 | -2.397 | 8.184  | 2.309  | 1.00 | 0.00 | H |
| HETATM | 95 | H113 | UNK | 1 | -3.107 | 9.369  | 1.210  | 1.00 | 0.00 | H |

|        |     |      |     |   |        |        |        |      |      |   |
|--------|-----|------|-----|---|--------|--------|--------|------|------|---|
| HETATM | 96  | C114 | UNK | 1 | -0.522 | 9.043  | 0.467  | 1.00 | 0.00 | C |
| HETATM | 97  | H115 | UNK | 1 | -0.071 | 8.893  | 1.453  | 1.00 | 0.00 | H |
| HETATM | 98  | H116 | UNK | 1 | 0.266  | 8.930  | -0.282 | 1.00 | 0.00 | H |
| HETATM | 99  | H117 | UNK | 1 | -0.885 | 10.075 | 0.413  | 1.00 | 0.00 | H |
| HETATM | 100 | C118 | UNK | 1 | -2.300 | 8.303  | -1.165 | 1.00 | 0.00 | C |
| HETATM | 101 | H119 | UNK | 1 | -2.672 | 9.331  | -1.238 | 1.00 | 0.00 | H |
| HETATM | 102 | H120 | UNK | 1 | -1.567 | 8.159  | -1.964 | 1.00 | 0.00 | H |
| HETATM | 103 | H121 | UNK | 1 | -3.141 | 7.627  | -1.354 | 1.00 | 0.00 | H |
| HETATM | 104 | C122 | UNK | 1 | 1.554  | -4.119 | 6.647  | 1.00 | 0.00 | C |
| HETATM | 105 | C123 | UNK | 1 | 1.503  | -3.121 | 7.819  | 1.00 | 0.00 | C |
| HETATM | 106 | H124 | UNK | 1 | 1.818  | -2.117 | 7.514  | 1.00 | 0.00 | H |
| HETATM | 107 | H125 | UNK | 1 | 0.500  | -3.050 | 8.254  | 1.00 | 0.00 | H |
| HETATM | 108 | H126 | UNK | 1 | 2.180  | -3.451 | 8.613  | 1.00 | 0.00 | H |
| HETATM | 109 | C127 | UNK | 1 | 1.109  | -5.505 | 7.173  | 1.00 | 0.00 | C |
| HETATM | 110 | H128 | UNK | 1 | 0.077  | -5.472 | 7.539  | 1.00 | 0.00 | H |
| HETATM | 111 | H129 | UNK | 1 | 1.163  | -6.272 | 6.395  | 1.00 | 0.00 | H |
| HETATM | 112 | H130 | UNK | 1 | 1.752  | -5.823 | 8.000  | 1.00 | 0.00 | H |
| HETATM | 113 | C131 | UNK | 1 | 3.018  | -4.206 | 6.155  | 1.00 | 0.00 | C |
| HETATM | 114 | H132 | UNK | 1 | 3.678  | -4.502 | 6.977  | 1.00 | 0.00 | H |
| HETATM | 115 | H133 | UNK | 1 | 3.138  | -4.944 | 5.356  | 1.00 | 0.00 | H |
| HETATM | 116 | H134 | UNK | 1 | 3.365  | -3.241 | 5.773  | 1.00 | 0.00 | H |
| HETATM | 117 | C135 | UNK | 1 | 0.663  | 2.878  | 6.472  | 1.00 | 0.00 | C |
| HETATM | 118 | C136 | UNK | 1 | -0.097 | 2.768  | 7.816  | 1.00 | 0.00 | C |
| HETATM | 119 | H137 | UNK | 1 | -1.041 | 3.321  | 7.779  | 1.00 | 0.00 | H |
| HETATM | 120 | H138 | UNK | 1 | -0.328 | 1.729  | 8.071  | 1.00 | 0.00 | H |
| HETATM | 121 | H139 | UNK | 1 | 0.508  | 3.183  | 8.629  | 1.00 | 0.00 | H |
| HETATM | 122 | C140 | UNK | 1 | 1.001  | 4.362  | 6.234  | 1.00 | 0.00 | C |
| HETATM | 123 | H141 | UNK | 1 | 0.101  | 4.983  | 6.184  | 1.00 | 0.00 | H |
| HETATM | 124 | H142 | UNK | 1 | 1.612  | 4.737  | 7.061  | 1.00 | 0.00 | H |
| HETATM | 125 | H143 | UNK | 1 | 1.572  | 4.511  | 5.312  | 1.00 | 0.00 | H |
| HETATM | 126 | C144 | UNK | 1 | 1.991  | 2.092  | 6.569  | 1.00 | 0.00 | C |
| HETATM | 127 | H145 | UNK | 1 | 2.615  | 2.495  | 7.374  | 1.00 | 0.00 | H |
| HETATM | 128 | H146 | UNK | 1 | 1.824  | 1.031  | 6.778  | 1.00 | 0.00 | H |
| HETATM | 129 | H147 | UNK | 1 | 2.555  | 2.167  | 5.633  | 1.00 | 0.00 | H |
| HETATM | 130 | C148 | UNK | 1 | 4.686  | -4.537 | 0.745  | 1.00 | 0.00 | C |
| HETATM | 131 | C149 | UNK | 1 | 5.186  | -5.976 | 0.461  | 1.00 | 0.00 | C |
| HETATM | 132 | H150 | UNK | 1 | 5.070  | -6.234 | -0.597 | 1.00 | 0.00 | H |
| HETATM | 133 | H151 | UNK | 1 | 6.246  | -6.073 | 0.720  | 1.00 | 0.00 | H |
| HETATM | 134 | H152 | UNK | 1 | 4.624  | -6.710 | 1.048  | 1.00 | 0.00 | H |
| HETATM | 135 | C153 | UNK | 1 | 4.910  | -4.228 | 2.239  | 1.00 | 0.00 | C |
| HETATM | 136 | H154 | UNK | 1 | 4.453  | -4.981 | 2.888  | 1.00 | 0.00 | H |
| HETATM | 137 | H155 | UNK | 1 | 5.982  | -4.226 | 2.460  | 1.00 | 0.00 | H |
| HETATM | 138 | H156 | UNK | 1 | 4.507  | -3.249 | 2.514  | 1.00 | 0.00 | H |
| HETATM | 139 | C157 | UNK | 1 | 5.532  | -3.547 | -0.084 | 1.00 | 0.00 | C |
| HETATM | 140 | H158 | UNK | 1 | 6.570  | -3.563 | 0.264  | 1.00 | 0.00 | H |
| HETATM | 141 | H159 | UNK | 1 | 5.547  | -3.805 | -1.146 | 1.00 | 0.00 | H |
| HETATM | 142 | H160 | UNK | 1 | 5.150  | -2.527 | 0.011  | 1.00 | 0.00 | H |
| HETATM | 143 | C161 | UNK | 1 | -2.930 | -2.107 | -4.821 | 1.00 | 0.00 | C |
| HETATM | 144 | C162 | UNK | 1 | -3.470 | -0.780 | -5.388 | 1.00 | 0.00 | C |
| HETATM | 145 | H163 | UNK | 1 | -2.910 | -0.459 | -6.272 | 1.00 | 0.00 | H |
| HETATM | 146 | H164 | UNK | 1 | -4.513 | -0.908 | -5.694 | 1.00 | 0.00 | H |
| HETATM | 147 | H165 | UNK | 1 | -3.438 | 0.026  | -4.648 | 1.00 | 0.00 | H |
| HETATM | 148 | C166 | UNK | 1 | -3.009 | -3.177 | -5.938 | 1.00 | 0.00 | C |
| HETATM | 149 | H167 | UNK | 1 | -2.373 | -2.906 | -6.786 | 1.00 | 0.00 | H |
| HETATM | 150 | H168 | UNK | 1 | -2.687 | -4.160 | -5.580 | 1.00 | 0.00 | H |
| HETATM | 151 | H169 | UNK | 1 | -4.038 | -3.273 | -6.302 | 1.00 | 0.00 | H |
| HETATM | 152 | C170 | UNK | 1 | -3.843 | -2.535 | -3.650 | 1.00 | 0.00 | C |
| HETATM | 153 | H171 | UNK | 1 | -4.873 | -2.666 | -4.000 | 1.00 | 0.00 | H |
| HETATM | 154 | H172 | UNK | 1 | -3.523 | -3.479 | -3.201 | 1.00 | 0.00 | H |
| HETATM | 155 | H173 | UNK | 1 | -3.854 | -1.773 | -2.864 | 1.00 | 0.00 | H |
| HETATM | 156 | C174 | UNK | 1 | -1.636 | 4.273  | -5.599 | 1.00 | 0.00 | C |
| HETATM | 157 | C175 | UNK | 1 | -1.034 | 4.455  | -7.013 | 1.00 | 0.00 | C |



|        |     |      |     |   |        |        |        |      |      |   |
|--------|-----|------|-----|---|--------|--------|--------|------|------|---|
| HETATM | 158 | H176 | UNK | 1 | -0.157 | 5.110  | -6.985 | 1.00 | 0.00 | H |
| HETATM | 159 | H177 | UNK | 1 | -0.725 | 3.502  | -7.452 | 1.00 | 0.00 | H |
| HETATM | 160 | H178 | UNK | 1 | -1.772 | 4.905  | -7.685 | 1.00 | 0.00 | H |
| HETATM | 161 | C179 | UNK | 1 | -2.875 | 3.351  | -5.686 | 1.00 | 0.00 | C |
| HETATM | 162 | H180 | UNK | 1 | -2.623 | 2.367  | -6.091 | 1.00 | 0.00 | H |
| HETATM | 163 | H181 | UNK | 1 | -3.325 | 3.204  | -4.699 | 1.00 | 0.00 | H |
| HETATM | 164 | H182 | UNK | 1 | -3.633 | 3.794  | -6.342 | 1.00 | 0.00 | H |
| HETATM | 165 | C183 | UNK | 1 | -2.099 | 5.655  | -5.098 | 1.00 | 0.00 | C |
| HETATM | 166 | H184 | UNK | 1 | -2.841 | 6.066  | -5.789 | 1.00 | 0.00 | H |
| HETATM | 167 | H185 | UNK | 1 | -2.568 | 5.598  | -4.111 | 1.00 | 0.00 | H |
| HETATM | 168 | H186 | UNK | 1 | -1.270 | 6.367  | -5.044 | 1.00 | 0.00 | H |
| HETATM | 169 | C187 | UNK | 1 | 2.969  | 3.210  | 1.414  | 1.00 | 0.00 | C |
| HETATM | 170 | H188 | UNK | 1 | 3.630  | 2.674  | 2.108  | 1.00 | 0.00 | H |
| HETATM | 171 | H189 | UNK | 1 | 3.265  | 2.871  | 0.416  | 1.00 | 0.00 | H |
| HETATM | 172 | C190 | UNK | 1 | 3.221  | 4.714  | 1.596  | 1.00 | 0.00 | C |
| HETATM | 173 | H191 | UNK | 1 | 2.588  | 5.304  | 0.926  | 1.00 | 0.00 | H |
| HETATM | 174 | H192 | UNK | 1 | 2.925  | 5.001  | 2.616  | 1.00 | 0.00 | H |
| HETATM | 175 | C193 | UNK | 1 | 4.690  | 5.094  | 1.374  | 1.00 | 0.00 | C |
| HETATM | 176 | H194 | UNK | 1 | 5.325  | 4.502  | 2.048  | 1.00 | 0.00 | H |
| HETATM | 177 | H195 | UNK | 1 | 4.988  | 4.808  | 0.354  | 1.00 | 0.00 | H |
| HETATM | 178 | C196 | UNK | 1 | 4.981  | 6.585  | 1.583  | 1.00 | 0.00 | C |
| HETATM | 179 | H197 | UNK | 1 | 4.347  | 7.176  | 0.909  | 1.00 | 0.00 | H |
| HETATM | 180 | H198 | UNK | 1 | 4.686  | 6.870  | 2.602  | 1.00 | 0.00 | H |
| HETATM | 181 | C199 | UNK | 1 | 6.451  | 6.951  | 1.356  | 1.00 | 0.00 | C |
| HETATM | 182 | H200 | UNK | 1 | 7.106  | 6.401  | 2.041  | 1.00 | 0.00 | H |
| HETATM | 183 | H201 | UNK | 1 | 6.766  | 6.711  | 0.334  | 1.00 | 0.00 | H |
| HETATM | 184 | H202 | UNK | 1 | 6.626  | 8.019  | 1.515  | 1.00 | 0.00 | H |
| HETATM | 185 | C203 | UNK | 1 | 4.979  | 1.789  | -2.231 | 1.00 | 0.00 | C |
| HETATM | 186 | H204 | UNK | 1 | 4.896  | 2.031  | -1.165 | 1.00 | 0.00 | H |
| HETATM | 187 | H205 | UNK | 1 | 4.878  | 0.700  | -2.320 | 1.00 | 0.00 | H |
| HETATM | 188 | C206 | UNK | 1 | 6.352  | 2.234  | -2.754 | 1.00 | 0.00 | C |
| HETATM | 189 | H207 | UNK | 1 | 6.422  | 2.024  | -3.831 | 1.00 | 0.00 | H |
| HETATM | 190 | H208 | UNK | 1 | 6.447  | 3.324  | -2.650 | 1.00 | 0.00 | H |
| HETATM | 191 | C209 | UNK | 1 | 7.520  | 1.553  | -2.030 | 1.00 | 0.00 | C |
| HETATM | 192 | H210 | UNK | 1 | 7.439  | 1.743  | -0.950 | 1.00 | 0.00 | H |
| HETATM | 193 | H211 | UNK | 1 | 7.437  | 0.464  | -2.154 | 1.00 | 0.00 | H |
| HETATM | 194 | C212 | UNK | 1 | 8.897  | 2.014  | -2.522 | 1.00 | 0.00 | C |
| HETATM | 195 | H213 | UNK | 1 | 8.976  | 1.828  | -3.602 | 1.00 | 0.00 | H |
| HETATM | 196 | H214 | UNK | 1 | 8.981  | 3.102  | -2.395 | 1.00 | 0.00 | H |
| HETATM | 197 | C215 | UNK | 1 | 10.058 | 1.324  | -1.799 | 1.00 | 0.00 | C |
| HETATM | 198 | H216 | UNK | 1 | 10.025 | 1.520  | -0.721 | 1.00 | 0.00 | H |
| HETATM | 199 | H217 | UNK | 1 | 10.024 | 0.238  | -1.940 | 1.00 | 0.00 | H |
| HETATM | 200 | H218 | UNK | 1 | 11.025 | 1.676  | -2.170 | 1.00 | 0.00 | H |
| HETATM | 201 | C219 | UNK | 1 | -3.838 | -3.255 | 0.927  | 1.00 | 0.00 | C |
| HETATM | 202 | H220 | UNK | 1 | -3.923 | -2.185 | 0.696  | 1.00 | 0.00 | H |
| HETATM | 203 | H221 | UNK | 1 | -3.171 | -3.690 | 0.173  | 1.00 | 0.00 | H |
| HETATM | 204 | C222 | UNK | 1 | -5.224 | -3.913 | 0.865  | 1.00 | 0.00 | C |
| HETATM | 205 | H223 | UNK | 1 | -5.127 | -4.988 | 1.071  | 1.00 | 0.00 | H |
| HETATM | 206 | H224 | UNK | 1 | -5.859 | -3.509 | 1.665  | 1.00 | 0.00 | H |
| HETATM | 207 | C225 | UNK | 1 | -5.928 | -3.719 | -0.483 | 1.00 | 0.00 | C |
| HETATM | 208 | H226 | UNK | 1 | -6.037 | -2.643 | -0.683 | 1.00 | 0.00 | H |
| HETATM | 209 | H227 | UNK | 1 | -5.292 | -4.112 | -1.287 | 1.00 | 0.00 | H |
| HETATM | 210 | C228 | UNK | 1 | -7.308 | -4.385 | -0.558 | 1.00 | 0.00 | C |
| HETATM | 211 | H229 | UNK | 1 | -7.199 | -5.462 | -0.368 | 1.00 | 0.00 | H |
| HETATM | 212 | H230 | UNK | 1 | -7.941 | -3.998 | 0.252  | 1.00 | 0.00 | H |
| HETATM | 213 | C231 | UNK | 1 | -8.008 | -4.172 | -1.903 | 1.00 | 0.00 | C |
| HETATM | 214 | H232 | UNK | 1 | -8.165 | -3.106 | -2.104 | 1.00 | 0.00 | H |
| HETATM | 215 | H233 | UNK | 1 | -7.414 | -4.580 | -2.728 | 1.00 | 0.00 | H |
| HETATM | 216 | H234 | UNK | 1 | -8.987 | -4.660 | -1.926 | 1.00 | 0.00 | H |
| HETATM | 217 | C235 | UNK | 1 | -5.147 | 0.028  | 2.753  | 1.00 | 0.00 | C |
| HETATM | 218 | H236 | UNK | 1 | -5.045 | -0.716 | 1.955  | 1.00 | 0.00 | H |
| HETATM | 219 | H237 | UNK | 1 | -4.930 | -0.484 | 3.697  | 1.00 | 0.00 | H |

|        |     |      |     |   |         |         |        |      |      |   |
|--------|-----|------|-----|---|---------|---------|--------|------|------|---|
| HETATM | 220 | C238 | UNK | 1 | -6.586  | 0.564   | 2.779  | 1.00 | 0.00 | C |
| HETATM | 221 | H239 | UNK | 1 | -6.684  | 1.308   | 3.583  | 1.00 | 0.00 | H |
| HETATM | 222 | H240 | UNK | 1 | -6.795  | 1.101   | 1.843  | 1.00 | 0.00 | H |
| HETATM | 223 | C241 | UNK | 1 | -7.635  | -0.537  | 2.979  | 1.00 | 0.00 | C |
| HETATM | 224 | H242 | UNK | 1 | -7.543  | -1.277  | 2.171  | 1.00 | 0.00 | H |
| HETATM | 225 | H243 | UNK | 1 | -7.421  | -1.078  | 3.912  | 1.00 | 0.00 | H |
| HETATM | 226 | C244 | UNK | 1 | -9.075  | -0.011  | 3.020  | 1.00 | 0.00 | C |
| HETATM | 227 | H245 | UNK | 1 | -9.169  | 0.723   | 3.831  | 1.00 | 0.00 | H |
| HETATM | 228 | H246 | UNK | 1 | -9.287  | 0.536   | 2.091  | 1.00 | 0.00 | H |
| HETATM | 229 | C247 | UNK | 1 | -10.115 | -1.119  | 3.210  | 1.00 | 0.00 | C |
| HETATM | 230 | H248 | UNK | 1 | -10.071 | -1.850  | 2.394  | 1.00 | 0.00 | H |
| HETATM | 231 | H249 | UNK | 1 | -9.951  | -1.660  | 4.148  | 1.00 | 0.00 | H |
| HETATM | 232 | H250 | UNK | 1 | -11.131 | -0.712  | 3.236  | 1.00 | 0.00 | H |
| HETATM | 233 | C251 | UNK | 1 | 4.923   | -2.229  | -4.245 | 1.00 | 0.00 | C |
| HETATM | 234 | H252 | UNK | 1 | 5.135   | -1.213  | -3.886 | 1.00 | 0.00 | H |
| HETATM | 235 | H253 | UNK | 1 | 5.109   | -2.901  | -3.398 | 1.00 | 0.00 | H |
| HETATM | 236 | C254 | UNK | 1 | 5.860   | -2.579  | -5.408 | 1.00 | 0.00 | C |
| HETATM | 237 | H255 | UNK | 1 | 5.636   | -3.593  | -5.766 | 1.00 | 0.00 | H |
| HETATM | 238 | H256 | UNK | 1 | 5.660   | -1.907  | -6.255 | 1.00 | 0.00 | H |
| HETATM | 239 | C257 | UNK | 1 | 7.345   | -2.492  | -5.034 | 1.00 | 0.00 | C |
| HETATM | 240 | H258 | UNK | 1 | 7.569   | -1.478  | -4.673 | 1.00 | 0.00 | H |
| HETATM | 241 | H259 | UNK | 1 | 7.547   | -3.166  | -4.190 | 1.00 | 0.00 | H |
| HETATM | 242 | C260 | UNK | 1 | 8.289   | -2.836  | -6.193 | 1.00 | 0.00 | C |
| HETATM | 243 | H261 | UNK | 1 | 8.063   | -3.848  | -6.554 | 1.00 | 0.00 | H |
| HETATM | 244 | H262 | UNK | 1 | 8.086   | -2.161  | -7.036 | 1.00 | 0.00 | H |
| HETATM | 245 | C263 | UNK | 1 | 9.769   | -2.747  | -5.812 | 1.00 | 0.00 | C |
| HETATM | 246 | H264 | UNK | 1 | 10.033  | -1.737  | -5.478 | 1.00 | 0.00 | H |
| HETATM | 247 | H265 | UNK | 1 | 10.011  | -3.438  | -4.996 | 1.00 | 0.00 | H |
| HETATM | 248 | H266 | UNK | 1 | 10.415  | -2.995  | -6.660 | 1.00 | 0.00 | H |
| HETATM | 249 | C267 | UNK | 1 | -2.531  | -6.473  | -1.566 | 1.00 | 0.00 | C |
| HETATM | 250 | H268 | UNK | 1 | -3.234  | -5.972  | -0.889 | 1.00 | 0.00 | H |
| HETATM | 251 | H269 | UNK | 1 | -2.591  | -5.947  | -2.528 | 1.00 | 0.00 | H |
| HETATM | 252 | C270 | UNK | 1 | -2.942  | -7.940  | -1.751 | 1.00 | 0.00 | C |
| HETATM | 253 | H271 | UNK | 1 | -2.219  | -8.443  | -2.408 | 1.00 | 0.00 | H |
| HETATM | 254 | H272 | UNK | 1 | -2.887  | -8.459  | -0.784 | 1.00 | 0.00 | H |
| HETATM | 255 | C273 | UNK | 1 | -4.351  | -8.104  | -2.334 | 1.00 | 0.00 | C |
| HETATM | 256 | H274 | UNK | 1 | -5.076  | -7.596  | -1.682 | 1.00 | 0.00 | H |
| HETATM | 257 | H275 | UNK | 1 | -4.404  | -7.589  | -3.305 | 1.00 | 0.00 | H |
| HETATM | 258 | C276 | UNK | 1 | -4.772  | -9.567  | -2.515 | 1.00 | 0.00 | C |
| HETATM | 259 | H277 | UNK | 1 | -4.044  | -10.075 | -3.162 | 1.00 | 0.00 | H |
| HETATM | 260 | H278 | UNK | 1 | -4.723  | -10.079 | -1.544 | 1.00 | 0.00 | H |
| HETATM | 261 | C279 | UNK | 1 | -6.176  | -9.723  | -3.105 | 1.00 | 0.00 | C |
| HETATM | 262 | H280 | UNK | 1 | -6.931  | -9.254  | -2.464 | 1.00 | 0.00 | H |
| HETATM | 263 | H281 | UNK | 1 | -6.245  | -9.255  | -4.093 | 1.00 | 0.00 | H |
| HETATM | 264 | H282 | UNK | 1 | -6.446  | -10.778 | -3.219 | 1.00 | 0.00 | H |
| HETATM | 265 | N91  | UNK | 1 | -0.801  | 0.132   | 0.116  | 1.00 | 0.00 | N |
| HETATM | 266 | C92  | UNK | 1 | 0.168   | -1.060  | 0.176  | 1.00 | 0.00 | C |
| HETATM | 267 | C93  | UNK | 1 | 3.918   | -0.309  | 2.233  | 1.00 | 0.00 | C |
| HETATM | 268 | C94  | UNK | 1 | 2.770   | -0.703  | 2.943  | 1.00 | 0.00 | C |
| HETATM | 269 | C95  | UNK | 1 | 1.563   | -0.935  | 2.289  | 1.00 | 0.00 | C |
| HETATM | 270 | C96  | UNK | 1 | 1.457   | -0.781  | 0.901  | 1.00 | 0.00 | C |
| HETATM | 271 | C97  | UNK | 1 | 2.598   | -0.403  | 0.180  | 1.00 | 0.00 | C |
| HETATM | 272 | C98  | UNK | 1 | 3.803   | -0.169  | 0.838  | 1.00 | 0.00 | C |
| HETATM | 273 | H99  | UNK | 1 | -0.402  | -1.871  | 0.633  | 1.00 | 0.00 | H |
| HETATM | 274 | H100 | UNK | 1 | 0.374   | -1.321  | -0.863 | 1.00 | 0.00 | H |
| HETATM | 275 | H101 | UNK | 1 | -0.284  | 1.031   | 0.174  | 1.00 | 0.00 | H |
| HETATM | 276 | H102 | UNK | 1 | -1.444  | 0.118   | 0.926  | 1.00 | 0.00 | H |
| HETATM | 277 | H103 | UNK | 1 | 2.824   | -0.856  | 4.016  | 1.00 | 0.00 | H |
| HETATM | 278 | H104 | UNK | 1 | 0.704   | -1.249  | 2.868  | 1.00 | 0.00 | H |
| HETATM | 279 | H105 | UNK | 1 | 2.550   | -0.280  | -0.898 | 1.00 | 0.00 | H |
| HETATM | 280 | H106 | UNK | 1 | 4.663   | 0.151   | 0.261  | 1.00 | 0.00 | H |
| HETATM | 281 | H107 | UNK | 1 | -1.980  | -0.955  | -1.237 | 1.00 | 0.00 | H |

|         |     |      |     |     |        |        |        |      |      |   |
|---------|-----|------|-----|-----|--------|--------|--------|------|------|---|
| HETATM  | 282 | H108 | UNK | 1   | -0.917 | 0.243  | -1.976 | 1.00 | 0.00 | H |
| HETATM  | 283 | C283 | UNK | 1   | 7.637  | 0.494  | 4.249  | 1.00 | 0.00 | C |
| HETATM  | 284 | C284 | UNK | 1   | 7.638  | -0.053 | 2.965  | 1.00 | 0.00 | C |
| HETATM  | 285 | C285 | UNK | 1   | 6.435  | -0.316 | 2.312  | 1.00 | 0.00 | C |
| HETATM  | 286 | C286 | UNK | 1   | 5.202  | -0.040 | 2.929  | 1.00 | 0.00 | C |
| HETATM  | 287 | C287 | UNK | 1   | 5.219  | 0.509  | 4.223  | 1.00 | 0.00 | C |
| HETATM  | 288 | C288 | UNK | 1   | 6.422  | 0.772  | 4.875  | 1.00 | 0.00 | C |
| HETATM  | 289 | H289 | UNK | 1   | 8.575  | 0.699  | 4.757  | 1.00 | 0.00 | H |
| HETATM  | 290 | H290 | UNK | 1   | 8.578  | -0.283 | 2.472  | 1.00 | 0.00 | H |
| HETATM  | 291 | H291 | UNK | 1   | 6.454  | -0.766 | 1.324  | 1.00 | 0.00 | H |
| HETATM  | 292 | H292 | UNK | 1   | 4.282  | 0.750  | 4.716  | 1.00 | 0.00 | H |
| HETATM  | 293 | H293 | UNK | 1   | 6.410  | 1.203  | 5.872  | 1.00 | 0.00 | H |
| HETATM  | 294 | C294 | UNK | 1   | -1.625 | 0.075  | -1.163 | 1.00 | 0.00 | C |
| HETATM  | 295 | C295 | UNK | 1   | -4.948 | 2.860  | -1.392 | 1.00 | 0.00 | C |
| HETATM  | 296 | C296 | UNK | 1   | -3.621 | 3.296  | -1.557 | 1.00 | 0.00 | C |
| HETATM  | 297 | C297 | UNK | 1   | -2.554 | 2.405  | -1.483 | 1.00 | 0.00 | C |
| HETATM  | 298 | C298 | UNK | 1   | -2.772 | 1.048  | -1.214 | 1.00 | 0.00 | C |
| HETATM  | 299 | C299 | UNK | 1   | -4.092 | 0.604  | -1.056 | 1.00 | 0.00 | C |
| HETATM  | 300 | C300 | UNK | 1   | -5.162 | 1.492  | -1.150 | 1.00 | 0.00 | C |
| HETATM  | 301 | H301 | UNK | 1   | -3.423 | 4.340  | -1.775 | 1.00 | 0.00 | H |
| HETATM  | 302 | H302 | UNK | 1   | -1.547 | 2.771  | -1.657 | 1.00 | 0.00 | H |
| HETATM  | 303 | H303 | UNK | 1   | -4.287 | -0.447 | -0.861 | 1.00 | 0.00 | H |
| HETATM  | 304 | H304 | UNK | 1   | -6.174 | 1.124  | -1.013 | 1.00 | 0.00 | H |
| HETATM  | 305 | C305 | UNK | 1   | -8.232 | 5.625  | -1.626 | 1.00 | 0.00 | C |
| HETATM  | 306 | C306 | UNK | 1   | -7.032 | 6.008  | -1.024 | 1.00 | 0.00 | C |
| HETATM  | 307 | C307 | UNK | 1   | -5.967 | 5.111  | -0.950 | 1.00 | 0.00 | C |
| HETATM  | 308 | C308 | UNK | 1   | -6.082 | 3.813  | -1.476 | 1.00 | 0.00 | C |
| HETATM  | 309 | C309 | UNK | 1   | -7.296 | 3.442  | -2.078 | 1.00 | 0.00 | C |
| HETATM  | 310 | C310 | UNK | 1   | -8.359 | 4.339  | -2.154 | 1.00 | 0.00 | C |
| HETATM  | 311 | H311 | UNK | 1   | -9.061 | 6.324  | -1.684 | 1.00 | 0.00 | H |
| HETATM  | 312 | H312 | UNK | 1   | -6.927 | 7.004  | -0.604 | 1.00 | 0.00 | H |
| HETATM  | 313 | H313 | UNK | 1   | -5.047 | 5.408  | -0.456 | 1.00 | 0.00 | H |
| HETATM  | 314 | H314 | UNK | 1   | -7.397 | 2.453  | -2.517 | 1.00 | 0.00 | H |
| HETATM  | 315 | H315 | UNK | 1   | -9.286 | 4.037  | -2.632 | 1.00 | 0.00 | H |
| CONNECT | 1   | 36   | 80  |     |        |        |        |      |      |   |
| CONNECT | 2   | 8    | 78  |     |        |        |        |      |      |   |
| CONNECT | 3   | 16   | 82  |     |        |        |        |      |      |   |
| CONNECT | 4   | 6    | 79  |     |        |        |        |      |      |   |
| CONNECT | 5   | 13   | 49  |     |        |        |        |      |      |   |
| CONNECT | 6   | 4    | 11  | 32  |        |        |        |      |      |   |
| CONNECT | 7   | 9    | 10  | 130 |        |        |        |      |      |   |
| CONNECT | 8   | 2    | 23  | 28  |        |        |        |      |      |   |
| CONNECT | 9   | 7    | 23  | 50  |        |        |        |      |      |   |
| CONNECT | 10  | 7    | 28  | 51  |        |        |        |      |      |   |
| CONNECT | 11  | 6    | 15  | 17  |        |        |        |      |      |   |
| CONNECT | 12  | 19   | 32  | 52  | 53     |        |        |      |      |   |
| CONNECT | 13  | 5    | 33  | 35  |        |        |        |      |      |   |
| CONNECT | 14  | 16   | 26  | 37  |        |        |        |      |      |   |
| CONNECT | 15  | 11   | 23  | 54  | 55     |        |        |      |      |   |
| CONNECT | 16  | 3    | 14  | 19  |        |        |        |      |      |   |
| CONNECT | 17  | 11   | 38  | 74  |        |        |        |      |      |   |
| CONNECT | 18  | 21   | 30  | 57  |        |        |        |      |      |   |
| CONNECT | 19  | 12   | 16  | 27  |        |        |        |      |      |   |
| CONNECT | 20  | 24   | 36  | 40  |        |        |        |      |      |   |
| CONNECT | 21  | 18   | 40  | 143 |        |        |        |      |      |   |
| CONNECT | 22  | 33   | 45  | 67  | 68     |        |        |      |      |   |
| CONNECT | 23  | 8    | 9   | 15  |        |        |        |      |      |   |
| CONNECT | 24  | 20   | 28  | 58  | 59     |        |        |      |      |   |
| CONNECT | 25  | 27   | 37  | 117 |        |        |        |      |      |   |
| CONNECT | 26  | 14   | 35  | 69  | 70     |        |        |      |      |   |
| CONNECT | 27  | 19   | 25  | 61  |        |        |        |      |      |   |
| CONNECT | 28  | 8    | 10  | 24  |        |        |        |      |      |   |

|         |    |    |    |     |     |
|---------|----|----|----|-----|-----|
| CONNECT | 29 | 34 | 35 | 62  |     |
| CONNECT | 30 | 18 | 36 | 41  |     |
| CONNECT | 31 | 33 | 34 | 72  |     |
| CONNECT | 32 | 6  | 12 | 39  |     |
| CONNECT | 33 | 13 | 22 | 31  |     |
| CONNECT | 34 | 29 | 31 | 91  |     |
| CONNECT | 35 | 13 | 26 | 29  |     |
| CONNECT | 36 | 1  | 20 | 30  |     |
| CONNECT | 37 | 14 | 25 | 63  |     |
| CONNECT | 38 | 17 | 39 | 104 |     |
| CONNECT | 39 | 32 | 38 | 64  |     |
| CONNECT | 40 | 20 | 21 | 73  |     |
| CONNECT | 41 | 30 | 47 | 65  | 66  |
| CONNECT | 42 | 43 | 47 | 75  |     |
| CONNECT | 43 | 42 | 44 | 156 |     |
| CONNECT | 44 | 43 | 45 | 71  |     |
| CONNECT | 45 | 22 | 44 | 46  |     |
| CONNECT | 46 | 45 | 47 | 48  |     |
| CONNECT | 47 | 41 | 42 | 46  |     |
| CONNECT | 48 | 46 | 81 |     |     |
| CONNECT | 49 | 5  | 76 | 77  | 169 |
| CONNECT | 50 | 9  |    |     |     |
| CONNECT | 51 | 10 |    |     |     |
| CONNECT | 52 | 12 |    |     |     |
| CONNECT | 53 | 12 |    |     |     |
| CONNECT | 54 | 15 |    |     |     |
| CONNECT | 55 | 15 |    |     |     |
| CONNECT | 56 | 79 |    |     |     |
| CONNECT | 57 | 18 |    |     |     |
| CONNECT | 58 | 24 |    |     |     |
| CONNECT | 59 | 24 |    |     |     |
| CONNECT | 60 | 82 |    |     |     |
| CONNECT | 61 | 27 |    |     |     |
| CONNECT | 62 | 29 |    |     |     |
| CONNECT | 63 | 37 |    |     |     |
| CONNECT | 64 | 39 |    |     |     |
| CONNECT | 65 | 41 |    |     |     |
| CONNECT | 66 | 41 |    |     |     |
| CONNECT | 67 | 22 |    |     |     |
| CONNECT | 68 | 22 |    |     |     |
| CONNECT | 69 | 26 |    |     |     |
| CONNECT | 70 | 26 |    |     |     |
| CONNECT | 71 | 44 |    |     |     |
| CONNECT | 72 | 31 |    |     |     |
| CONNECT | 73 | 40 |    |     |     |
| CONNECT | 74 | 17 |    |     |     |
| CONNECT | 75 | 42 |    |     |     |
| CONNECT | 76 | 49 |    |     |     |
| CONNECT | 77 | 49 |    |     |     |
| CONNECT | 78 | 2  | 84 | 90  | 249 |
| CONNECT | 79 | 4  | 56 | 85  | 201 |
| CONNECT | 80 | 1  | 83 | 86  | 233 |
| CONNECT | 81 | 48 | 87 | 88  | 185 |
| CONNECT | 82 | 3  | 60 | 89  | 217 |
| CONNECT | 83 | 80 |    |     |     |
| CONNECT | 84 | 78 |    |     |     |
| CONNECT | 85 | 79 |    |     |     |
| CONNECT | 86 | 80 |    |     |     |
| CONNECT | 87 | 81 |    |     |     |
| CONNECT | 88 | 81 |    |     |     |
| CONNECT | 89 | 82 |    |     |     |
| CONNECT | 90 | 78 |    |     |     |

|         |     |     |     |     |     |
|---------|-----|-----|-----|-----|-----|
| CONNECT | 91  | 34  | 92  | 96  | 100 |
| CONNECT | 92  | 91  | 93  | 94  | 95  |
| CONNECT | 93  | 92  |     |     |     |
| CONNECT | 94  | 92  |     |     |     |
| CONNECT | 95  | 92  |     |     |     |
| CONNECT | 96  | 91  | 97  | 98  | 99  |
| CONNECT | 97  | 96  |     |     |     |
| CONNECT | 98  | 96  |     |     |     |
| CONNECT | 99  | 96  |     |     |     |
| CONNECT | 100 | 91  | 101 | 102 | 103 |
| CONNECT | 101 | 100 |     |     |     |
| CONNECT | 102 | 100 |     |     |     |
| CONNECT | 103 | 100 |     |     |     |
| CONNECT | 104 | 38  | 105 | 109 | 113 |
| CONNECT | 105 | 104 | 106 | 107 | 108 |
| CONNECT | 106 | 105 |     |     |     |
| CONNECT | 107 | 105 |     |     |     |
| CONNECT | 108 | 105 |     |     |     |
| CONNECT | 109 | 104 | 110 | 111 | 112 |
| CONNECT | 110 | 109 |     |     |     |
| CONNECT | 111 | 109 |     |     |     |
| CONNECT | 112 | 109 |     |     |     |
| CONNECT | 113 | 104 | 114 | 115 | 116 |
| CONNECT | 114 | 113 |     |     |     |
| CONNECT | 115 | 113 |     |     |     |
| CONNECT | 116 | 113 |     |     |     |
| CONNECT | 117 | 25  | 118 | 122 | 126 |
| CONNECT | 118 | 117 | 119 | 120 | 121 |
| CONNECT | 119 | 118 |     |     |     |
| CONNECT | 120 | 118 |     |     |     |
| CONNECT | 121 | 118 |     |     |     |
| CONNECT | 122 | 117 | 123 | 124 | 125 |
| CONNECT | 123 | 122 |     |     |     |
| CONNECT | 124 | 122 |     |     |     |
| CONNECT | 125 | 122 |     |     |     |
| CONNECT | 126 | 117 | 127 | 128 | 129 |
| CONNECT | 127 | 126 |     |     |     |
| CONNECT | 128 | 126 |     |     |     |
| CONNECT | 129 | 126 |     |     |     |
| CONNECT | 130 | 7   | 131 | 135 | 139 |
| CONNECT | 131 | 130 | 132 | 133 | 134 |
| CONNECT | 132 | 131 |     |     |     |
| CONNECT | 133 | 131 |     |     |     |
| CONNECT | 134 | 131 |     |     |     |
| CONNECT | 135 | 130 | 136 | 137 | 138 |
| CONNECT | 136 | 135 |     |     |     |
| CONNECT | 137 | 135 |     |     |     |
| CONNECT | 138 | 135 |     |     |     |
| CONNECT | 139 | 130 | 140 | 141 | 142 |
| CONNECT | 140 | 139 |     |     |     |
| CONNECT | 141 | 139 |     |     |     |
| CONNECT | 142 | 139 |     |     |     |
| CONNECT | 143 | 21  | 144 | 148 | 152 |
| CONNECT | 144 | 143 | 145 | 146 | 147 |
| CONNECT | 145 | 144 |     |     |     |
| CONNECT | 146 | 144 |     |     |     |
| CONNECT | 147 | 144 |     |     |     |
| CONNECT | 148 | 143 | 149 | 150 | 151 |
| CONNECT | 149 | 148 |     |     |     |
| CONNECT | 150 | 148 |     |     |     |
| CONNECT | 151 | 148 |     |     |     |
| CONNECT | 152 | 143 | 153 | 154 | 155 |

|         |     |     |     |     |     |
|---------|-----|-----|-----|-----|-----|
| CONNECT | 153 | 152 |     |     |     |
| CONNECT | 154 | 152 |     |     |     |
| CONNECT | 155 | 152 |     |     |     |
| CONNECT | 156 | 43  | 157 | 161 | 165 |
| CONNECT | 157 | 156 | 158 | 159 | 160 |
| CONNECT | 158 | 157 |     |     |     |
| CONNECT | 159 | 157 |     |     |     |
| CONNECT | 160 | 157 |     |     |     |
| CONNECT | 161 | 156 | 162 | 163 | 164 |
| CONNECT | 162 | 161 |     |     |     |
| CONNECT | 163 | 161 |     |     |     |
| CONNECT | 164 | 161 |     |     |     |
| CONNECT | 165 | 156 | 166 | 167 | 168 |
| CONNECT | 166 | 165 |     |     |     |
| CONNECT | 167 | 165 |     |     |     |
| CONNECT | 168 | 165 |     |     |     |
| CONNECT | 169 | 49  | 170 | 171 | 172 |
| CONNECT | 170 | 169 |     |     |     |
| CONNECT | 171 | 169 |     |     |     |
| CONNECT | 172 | 169 | 173 | 174 | 175 |
| CONNECT | 173 | 172 |     |     |     |
| CONNECT | 174 | 172 |     |     |     |
| CONNECT | 175 | 172 | 176 | 177 | 178 |
| CONNECT | 176 | 175 |     |     |     |
| CONNECT | 177 | 175 |     |     |     |
| CONNECT | 178 | 175 | 179 | 180 | 181 |
| CONNECT | 179 | 178 |     |     |     |
| CONNECT | 180 | 178 |     |     |     |
| CONNECT | 181 | 178 | 182 | 183 | 184 |
| CONNECT | 182 | 181 |     |     |     |
| CONNECT | 183 | 181 |     |     |     |
| CONNECT | 184 | 181 |     |     |     |
| CONNECT | 185 | 81  | 186 | 187 | 188 |
| CONNECT | 186 | 185 |     |     |     |
| CONNECT | 187 | 185 |     |     |     |
| CONNECT | 188 | 185 | 189 | 190 | 191 |
| CONNECT | 189 | 188 |     |     |     |
| CONNECT | 190 | 188 |     |     |     |
| CONNECT | 191 | 188 | 192 | 193 | 194 |
| CONNECT | 192 | 191 |     |     |     |
| CONNECT | 193 | 191 |     |     |     |
| CONNECT | 194 | 191 | 195 | 196 | 197 |
| CONNECT | 195 | 194 |     |     |     |
| CONNECT | 196 | 194 |     |     |     |
| CONNECT | 197 | 194 | 198 | 199 | 200 |
| CONNECT | 198 | 197 |     |     |     |
| CONNECT | 199 | 197 |     |     |     |
| CONNECT | 200 | 197 |     |     |     |
| CONNECT | 201 | 79  | 202 | 203 | 204 |
| CONNECT | 202 | 201 |     |     |     |
| CONNECT | 203 | 201 |     |     |     |
| CONNECT | 204 | 201 | 205 | 206 | 207 |
| CONNECT | 205 | 204 |     |     |     |
| CONNECT | 206 | 204 |     |     |     |
| CONNECT | 207 | 204 | 208 | 209 | 210 |
| CONNECT | 208 | 207 |     |     |     |
| CONNECT | 209 | 207 |     |     |     |
| CONNECT | 210 | 207 | 211 | 212 | 213 |
| CONNECT | 211 | 210 |     |     |     |
| CONNECT | 212 | 210 |     |     |     |
| CONNECT | 213 | 210 | 214 | 215 | 216 |
| CONNECT | 214 | 213 |     |     |     |

|         |     |     |     |     |     |
|---------|-----|-----|-----|-----|-----|
| CONNECT | 215 | 213 |     |     |     |
| CONNECT | 216 | 213 |     |     |     |
| CONNECT | 217 | 82  | 218 | 219 | 220 |
| CONNECT | 218 | 217 |     |     |     |
| CONNECT | 219 | 217 |     |     |     |
| CONNECT | 220 | 217 | 221 | 222 | 223 |
| CONNECT | 221 | 220 |     |     |     |
| CONNECT | 222 | 220 |     |     |     |
| CONNECT | 223 | 220 | 224 | 225 | 226 |
| CONNECT | 224 | 223 |     |     |     |
| CONNECT | 225 | 223 |     |     |     |
| CONNECT | 226 | 223 | 227 | 228 | 229 |
| CONNECT | 227 | 226 |     |     |     |
| CONNECT | 228 | 226 |     |     |     |
| CONNECT | 229 | 226 | 230 | 231 | 232 |
| CONNECT | 230 | 229 |     |     |     |
| CONNECT | 231 | 229 |     |     |     |
| CONNECT | 232 | 229 |     |     |     |
| CONNECT | 233 | 80  | 234 | 235 | 236 |
| CONNECT | 234 | 233 |     |     |     |
| CONNECT | 235 | 233 |     |     |     |
| CONNECT | 236 | 233 | 237 | 238 | 239 |
| CONNECT | 237 | 236 |     |     |     |
| CONNECT | 238 | 236 |     |     |     |
| CONNECT | 239 | 236 | 240 | 241 | 242 |
| CONNECT | 240 | 239 |     |     |     |
| CONNECT | 241 | 239 |     |     |     |
| CONNECT | 242 | 239 | 243 | 244 | 245 |
| CONNECT | 243 | 242 |     |     |     |
| CONNECT | 244 | 242 |     |     |     |
| CONNECT | 245 | 242 | 246 | 247 | 248 |
| CONNECT | 246 | 245 |     |     |     |
| CONNECT | 247 | 245 |     |     |     |
| CONNECT | 248 | 245 |     |     |     |
| CONNECT | 249 | 78  | 250 | 251 | 252 |
| CONNECT | 250 | 249 |     |     |     |
| CONNECT | 251 | 249 |     |     |     |
| CONNECT | 252 | 249 | 253 | 254 | 255 |
| CONNECT | 253 | 252 |     |     |     |
| CONNECT | 254 | 252 |     |     |     |
| CONNECT | 255 | 252 | 256 | 257 | 258 |
| CONNECT | 256 | 255 |     |     |     |
| CONNECT | 257 | 255 |     |     |     |
| CONNECT | 258 | 255 | 259 | 260 | 261 |
| CONNECT | 259 | 258 |     |     |     |
| CONNECT | 260 | 258 |     |     |     |
| CONNECT | 261 | 258 | 262 | 263 | 264 |
| CONNECT | 262 | 261 |     |     |     |
| CONNECT | 263 | 261 |     |     |     |
| CONNECT | 264 | 261 |     |     |     |
| CONNECT | 265 | 266 | 275 | 276 | 294 |
| CONNECT | 266 | 265 | 270 | 273 | 274 |
| CONNECT | 267 | 268 | 272 | 286 |     |
| CONNECT | 268 | 267 | 269 | 277 |     |
| CONNECT | 269 | 268 | 270 | 278 |     |
| CONNECT | 270 | 266 | 269 | 271 |     |
| CONNECT | 271 | 270 | 272 | 279 |     |
| CONNECT | 272 | 267 | 271 | 280 |     |
| CONNECT | 273 | 266 |     |     |     |
| CONNECT | 274 | 266 |     |     |     |
| CONNECT | 275 | 265 |     |     |     |
| CONNECT | 276 | 265 |     |     |     |

```

CONNECT 277 268
CONNECT 278 269
CONNECT 279 271
CONNECT 280 272
CONNECT 281 294
CONNECT 282 294
CONNECT 283 284 288 289
CONNECT 284 283 285 290
CONNECT 285 284 286 291
CONNECT 286 267 285 287
CONNECT 287 286 288 292
CONNECT 288 283 287 293
CONNECT 289 283
CONNECT 290 284
CONNECT 291 285
CONNECT 292 287
CONNECT 293 288
CONNECT 294 265 281 282 298
CONNECT 295 296 300 308
CONNECT 296 295 297 301
CONNECT 297 296 298 302
CONNECT 298 294 297 299
CONNECT 299 298 300 303
CONNECT 300 295 299 304
CONNECT 301 296
CONNECT 302 297
CONNECT 303 299
CONNECT 304 300
CONNECT 305 306 310 311
CONNECT 306 305 307 312
CONNECT 307 306 308 313
CONNECT 308 295 307 309
CONNECT 309 308 310 314
CONNECT 310 305 309 315
CONNECT 311 305
CONNECT 312 306
CONNECT 313 307
CONNECT 314 309
CONNECT 315 310
MASTER      0      0      0      0      0      0      0      0      3 315      0 315      0
END

```
